# Supplementary material for: Toxicoproteomic Profiling of hPXR Transgenic Mice Treated with Rifampicin and Isoniazid
Source: PubMed Central journal article supplement (PMC7407182; doi:10.3390/cells9071654), 2020-07-09
Supplement: cells-09-01654-s001.pdf [file cells-09-01654-s001.pdf]

**Supplementary Table S1.** Relative change in proteins associated with heme biosynthesis and degradation.

| Protein                                          | Gene          | <i>hPXR</i> |      |      | <i>mPxr<sup>-/-</sup></i> |                |
|--------------------------------------------------|---------------|-------------|------|------|---------------------------|----------------|
|                                                  |               | RIF/INH     | INH  | RIF  | RIF/INH                   | <i>p</i> Value |
| 5-aminolevulinate synthase                       | <i>Alas1</i>  | 1.90        | 2.61 | 1.05 | 1.41                      | 0.28           |
| 5-aminolevulinate synthase                       | <i>Alas2</i>  | 0.86        | 1.38 | 0.73 | 1.18                      | 0.018          |
| Delta-aminolevulinic acid dehydratase            | <i>Alad</i>   | 0.96        | 1.00 | 1.02 | 0.95                      | 0.75           |
| Porphobilinogen deaminase                        | <i>Hmbs</i>   | 1.04        | 0.99 | 1.10 | 1.05                      | 0.67           |
| Uroporphyrinogen-III synthase                    | <i>Uros</i>   | 1.19        | 1.09 | 1.31 | 1.38                      | 0.012          |
| Uroporphyrinogen decarboxylase                   | <i>Urod</i>   | 0.92        | 1.03 | 0.94 | 0.92                      | 0.33           |
| Oxygen-dependent coproporphyrinogen-III oxidase, | <i>Cpox</i>   | 1.13        | 1.04 | 1.18 | 1.15                      | 0.20           |
| Protoporphyrinogen oxidase                       | <i>Ppox</i>   | 0.69        | 0.81 | 0.85 | 0.83                      | 0.013          |
| Ferrochelatase,                                  | <i>Fech</i>   | 0.39        | 0.50 | 0.88 | 0.43                      | 0.000002       |
| Heme oxygenase 1                                 | <i>Hmox1</i>  | 1.15        | 0.86 | 0.91 | 1.11                      | 0.34           |
| Heme oxygenase 2                                 | <i>Hmox2</i>  | 0.96        | 0.98 | 0.89 | 0.88                      | 0.22           |
| Biliverdin reductase A                           | <i>Blvra</i>  | 0.84        | 0.92 | 0.82 | 0.92                      | 0.032          |
| UDP-glucuronosyltransferase 1-6                  | <i>Ugt1a6</i> | 1.22        | 0.96 | 1.10 | 1.13                      | 0.30           |
| NADPH--cytochrome P450 reductase                 | <i>Por</i>    | 1.28        | 0.92 | 1.18 | 1.12                      | 0.019          |

INH, isoniazid; RIF, rifampicin; RIF/INH, rifampicin and isoniazid.

**Supplementary Table S2.** Relative change in protein nuclear receptors.

| Protein                                          | Gene         | <i>hPXR</i> |      |      | <i>mPxr</i> <sup>-/-</sup> |       | <i>p</i> Value |
|--------------------------------------------------|--------------|-------------|------|------|----------------------------|-------|----------------|
|                                                  |              | RIF/INH     | INH  | RIF  | RIF/INH                    |       |                |
| Aryl hydrocarbon receptor                        | <i>Ahr</i>   | 1.09        | 0.91 | 1.00 | 1.26                       | 0.092 |                |
| Hepatocyte nuclear factor 1-alpha                | <i>Hnf1a</i> | 0.87        | 0.97 | 0.82 | 0.79                       | 0.027 |                |
| Hepatocyte nuclear factor 4-alpha                | <i>Hnf4a</i> | 0.95        | 1.05 | 0.97 | 1.08                       | 0.20  |                |
| Oxysterols receptor LXR-alpha                    | <i>Nr1h3</i> | 0.94        | 1.16 | 1.03 | 1.02                       | 0.42  |                |
| Bile acid receptor                               | <i>Nr1h4</i> | 1.05        | 1.17 | 0.98 | 1.19                       | 0.12  |                |
| Retinoic acid receptor RXR-alpha                 | <i>Rxra</i>  | 0.88        | 1.03 | 0.83 | 0.95                       | 0.12  |                |
| Peroxisome proliferator-activated receptor alpha | <i>Ppara</i> | 0.85        | 0.96 | 0.79 | 0.94                       | 0.64  |                |
| Nuclear receptor subfamily 1 group D member 1    | <i>Nr1d1</i> | 0.32        | 0.32 | 0.51 | 0.90                       | 0.37  |                |
| Oxysterols receptor LXR-beta                     | <i>Nr1h2</i> | 1.11        | 1.14 | 1.08 | 1.05                       | 0.62  |                |
| Bile acid receptor                               | <i>Nr1h4</i> | 1.05        | 1.17 | 0.98 | 1.19                       | 0.12  |                |
| COUP transcription factor 1                      | <i>Nr2f1</i> | 0.98        | 1.04 | 0.94 | 1.00                       | 0.67  |                |
| COUP transcription factor 2                      | <i>Nr2f2</i> | 0.98        | 1.04 | 0.94 | 1.00                       | 0.67  |                |
| Nuclear receptor subfamily 2 group F member 6    | <i>Nr2f6</i> | 1.01        | 1.04 | 0.97 | 1.08                       | 0.45  |                |
| Glucocorticoid receptor                          | <i>Nr3c1</i> | 0.91        | 1.03 | 0.88 | 0.96                       | 0.049 |                |
| Nuclear receptor subfamily 5 group A member 2    | <i>Nr5a2</i> | 0.80        | 1.00 | 0.83 | 0.97                       | 0.016 |                |

INH, isoniazid; RIF, rifampicin; RIF/INH, rifampicin and isoniazid.

**Supplementary Table S3.** Relative change in proteins associated with iron metabolism.

| Protein                                    | Gene         | <i>hPXR</i> |      |      | <i>mPXR</i> <sup>-/-</sup> | <i>p</i> Value |
|--------------------------------------------|--------------|-------------|------|------|----------------------------|----------------|
|                                            |              | RIF/INH     | INH  | RIF  | RIF/INH                    |                |
| Serotransferrin                            | <i>Tf</i>    | 1.33        | 1.04 | 1.15 | 1.11                       | 0.144145       |
| Transferrin receptor protein 1             | <i>Tfrc</i>  | 1.28        | 0.98 | 1.13 | 1.14                       | 0.46           |
| Lactotransferrin                           | <i>Ltf</i>   | 0.40        | 0.38 | 0.38 | 0.27                       | 0.036          |
| Transferrin receptor protein 2             | <i>Tfr2</i>  | 0.99        | 1.02 | 0.82 | 0.86                       | 0.13           |
| Hereditary hemochromatosis protein homolog | <i>Hfe</i>   | 0.93        | 0.92 | 0.90 | 0.94                       | 0.70           |
| Ferritin light chain 1                     | <i>Ftl1</i>  | 0.28        | 0.36 | 0.58 | 0.44                       | 8.42E-05       |
| Ferritin heavy chain                       | <i>Fth1</i>  | 0.47        | 0.63 | 0.70 | 0.59                       | 0.097          |
| Cytoplasmic aconitate hydratase            | <i>Aco1</i>  | 1.05        | 1.00 | 1.08 | 1.00                       | 0.53           |
| ATP-binding cassette sub-family B member 7 | <i>Abcb7</i> | 0.83        | 0.98 | 0.79 | 0.91                       | 0.019          |

INH, isoniazid; RIF, rifampicin; RIF/INH, rifampicin and isoniazid.

**Supplementary Table S4.** Relative change in CYPs and steroid metabolism enzymes.

| Protein                                             | Gene           | <i>hPXR</i> |      |      | <i>mPxr<sup>-/-</sup></i> |         | <i>p</i> Value |
|-----------------------------------------------------|----------------|-------------|------|------|---------------------------|---------|----------------|
|                                                     |                | RIF/INH     | INH  | RIF  | RIF/INH                   |         |                |
| Cytochrome P450 1A2                                 | <i>Cyp1a2</i>  | 0.60        | 0.48 | 1.47 | 0.53                      | 0.037   |                |
| Cytochrome P450 2A12                                | <i>Cyp2a12</i> | 0.98        | 0.78 | 1.53 | 0.91                      | 0.022   |                |
| Cytochrome P450 2A5                                 | <i>Cyp2a5</i>  | 1.77        | 0.62 | 2.93 | 1.01                      | 0.00076 |                |
| Cytochrome P450 2B10                                | <i>Cyp2b10</i> | 4.96        | 0.91 | 2.49 | 0.98                      | 0.00032 |                |
| Cytochrome P450 2C29                                | <i>Cyp2c29</i> | 1.17        | 1.02 | 1.56 | 0.67                      | 0.038   |                |
| Cytochrome P450 2D10                                | <i>Cyp2d10</i> | 0.98        | 0.90 | 1.03 | 0.99                      | 0.92    |                |
| Cytochrome P450 2D26                                | <i>Cyp2d26</i> | 0.76        | 0.71 | 1.13 | 0.75                      | 0.0021  |                |
| Cytochrome P450 2E1                                 | <i>Cyp2e1</i>  | 1.22        | 1.18 | 0.93 | 1.47                      | 0.00035 |                |
| Cytochrome P450 2F2                                 | <i>Cyp2f2</i>  | 0.61        | 0.61 | 0.75 | 0.52                      | 0.028   |                |
| Cytochrome P450 2J6                                 | <i>Cyp2j6</i>  | 0.98        | 0.89 | 1.04 | 1.06                      | 0.68    |                |
| Cytochrome P450 3A11                                | <i>Cyp3a11</i> | 3.89        | 1.18 | 4.64 | 1.31                      | 0.00086 |                |
| Cytochrome P450 3A25                                | <i>Cyp3a25</i> | 1.64        | 0.95 | 1.36 | 1.15                      | 0.037   |                |
| Cytochrome P450 4A10                                | <i>Cyp4a10</i> | 2.38        | 1.61 | 4.45 | 1.78                      | 0.012   |                |
| Cholesterol 7- $\alpha$ -monooxygenase              | <i>Cyp7a1</i>  | 1.08        | 0.65 | 0.86 | 1.85                      | 0.095   |                |
| 25-hydroxycholesterol 7- $\alpha$ -hydroxylase      | <i>Cyp7b1</i>  | 0.49        | 0.55 | 0.39 | 0.64                      | 0.12    |                |
| Sterol 26-hydroxylase                               | <i>Cyp27a1</i> | 0.70        | 0.73 | 0.82 | 0.80                      | 0.032   |                |
| Lanosterol 14- $\alpha$ demethylase                 | <i>Cyp51a1</i> | 0.94        | 0.66 | 1.30 | 1.56                      | 0.43    |                |
| Hydroxymethylglutaryl-CoA synthase                  | <i>Hmgcs1</i>  | 1.51        | 1.29 | 1.74 | 2.53                      | 0.036   |                |
| Hydroxymethylglutaryl-CoA synthase                  | <i>Hmgcs2</i>  | 1.26        | 1.55 | 1.23 | 1.19                      | 0.027   |                |
| 3-hydroxy-3-methylglutaryl-coenzyme A reductase     | <i>Hmgcr</i>   | 1.56        | 1.27 | 1.51 | 1.74                      | 0.35    |                |
| 3 $\beta$ -hydroxysteroid dehydrogenase type 4      | <i>Hsd3b4</i>  | 0.20        | 1.07 | 0.10 | 0.48                      | 0.0012  |                |
| Corticosteroid 11- $\beta$ -dehydrogenase isozyme 1 | <i>Hsd11b1</i> | 0.99        | 1.00 | 0.83 | 1.09                      | 0.75    |                |

INH, isoniazid; RIF, rifampicin; RIF/INH, rifampicin and isoniazid.

**Supplementary Table S5.** Relative change in proteins associated with oxidative stress responses.

| Protein                                           | Gene         | <i>hPXR</i> |      |      | <i>mPxr</i> <sup>-/-</sup> | <i>p</i> Value |
|---------------------------------------------------|--------------|-------------|------|------|----------------------------|----------------|
|                                                   |              | RIF/INH     | INH  | RIF  | RIF/INH                    |                |
| Glutathione synthetase                            | <i>Gss</i>   | 0.95        | 0.80 | 0.91 | 0.76                       | 0.084          |
| Phospholipid hydroperoxide glutathione peroxidase | <i>Gpx4</i>  | 1.44        | 1.05 | 1.56 | 1.23                       | 0.0016         |
| Glutathione S-transferase mu 1                    | <i>Gstm1</i> | 1.59        | 0.80 | 2.50 | 1.19                       | 7.23E-06       |
| Glutathione S-transferase mu 2                    | <i>Gstm2</i> | 2.01        | 0.85 | 2.96 | 1.61                       | 5.54E-06       |
| Glutathione S-transferase mu 3                    | <i>Gstm3</i> | 3.02        | 0.87 | 4.54 | 1.33                       | 4.5E-06        |
| Glutathione S-transferase mu 4                    | <i>Gstm4</i> | 1.50        | 0.84 | 2.37 | 1.28                       | 9.418E-06      |
| Glutathione S-transferase mu 5                    | <i>Gstm5</i> | 1.35        | 0.88 | 1.79 | 1.14                       | 5.69E-05       |
| Glutathione S-transferase mu 6                    | <i>Gstm6</i> | 1.67        | 0.79 | 2.41 | 1.16                       | 1.25E-05       |
| Glutathione S-transferase mu 7                    | <i>Gstm7</i> | 1.57        | 0.81 | 2.30 | 1.16                       | 1E-05          |
| Glutathione S-transferase A1                      | <i>Gsta1</i> | 1.72        | 0.86 | 2.70 | 1.40                       | 0.00019        |
| Glutathione S-transferase theta-1                 | <i>Gstt1</i> | 1.08        | 1.12 | 1.30 | 0.92                       | 0.22           |
| Glutathione S-transferase theta-2                 | <i>Gstt2</i> | 1.40        | 0.99 | 1.51 | 1.01                       | 0.034          |
| Fumarylacetoacetase                               | <i>Fah</i>   | 0.93        | 0.97 | 0.93 | 0.99                       | 0.62           |
| Catalase                                          | <i>Cat</i>   | 1.16        | 1.02 | 1.44 | 1.08                       | 0.038          |
| Superoxide dismutase                              | <i>Sod2</i>  | 0.82        | 0.92 | 0.85 | 0.93                       | 0.052          |
| NAD(P)H dehydrogenase [quinone] 1                 | <i>Nqo1</i>  | 1.52        | 0.87 | 2.60 | 1.92                       | 0.00027        |

INH, isoniazid; RIF, rifampicin; RIF/INH, rifampicin and isoniazid.

**Supplementary Table S6.** Relative change in proteins associated with wound healing and inflammation.

| Protein                                               | Gene          | <i>hPXR</i> |      |      | <i>mPxr</i> <sup>-/-</sup> | <i>p</i> Value |
|-------------------------------------------------------|---------------|-------------|------|------|----------------------------|----------------|
|                                                       |               | RIF/INH     | INH  | RIF  | RIF/INH                    |                |
| Glutamine synthetase                                  | <i>Glul</i>   | 0.85        | 1.03 | 0.72 | 1.17                       | 0.16           |
| Carbonic anhydrase 3                                  | <i>Ca3</i>    | 1.23        | 1.14 | 1.18 | 1.19                       | 0.81           |
| Transforming growth factor-beta-induced protein ig-h3 | <i>Tgfb1</i>  | 0.88        | 0.75 | 0.60 | 0.69                       | 0.44           |
| Protein-glutamine gamma-glutamyltransferase 2         | <i>Tgm2</i>   | 1.12        | 0.81 | 1.19 | 0.88                       | 0.0059         |
| SPARC                                                 | <i>Sparc</i>  | 0.85        | 0.86 | 0.72 | 0.83                       | 0.089          |
| Collagen alpha-1(III) chain                           | <i>Col3a1</i> | 1.94        | 0.34 | 0.28 | 0.35                       | 0.056          |
| Collagen alpha-1(IV) chain                            | <i>Col4a1</i> | 1.27        | 0.86 | 0.83 | 0.90                       | 0.0033         |
| Collagen alpha-1(VI) chain                            | <i>Col6a1</i> | 1.10        | 0.67 | 0.47 | 0.63                       | 0.0091         |
| Annexin A2                                            | <i>Anxa2</i>  | 1.43        | 0.89 | 0.94 | 1.08                       | 0.30           |
| Annexin A5                                            | <i>Anxa5</i>  | 1.56        | 0.98 | 1.57 | 1.22                       | 0.032          |
| Biglycan                                              | <i>Bgn</i>    | 1.37        | 0.94 | 0.74 | 1.08                       | 0.44           |
| G1/S-specific cyclin-D1                               | <i>Cnd1</i>   | 1.40        | 0.69 | 1.24 | 1.03                       | 0.19           |
| T-lymphocyte activation antigen CD86                  | <i>Cd86</i>   | 1.08        | 0.86 | 1.03 | 0.96                       | 0.13           |

INH, isoniazid; RIF, rifampicin; RIF/INH, rifampicin and isoniazid.

**Supplementary Table S7.** Relative change in [Fe-S] cluster-containing proteins.

| Protein                                                                      | Gene          | <i>hPXR</i> |      |      | <i>mPxr</i> <sup>-/-</sup> | <i>p</i> Value |
|------------------------------------------------------------------------------|---------------|-------------|------|------|----------------------------|----------------|
|                                                                              |               | RIF/INH     | INH  | RIF  | RIF/INH                    |                |
| NADH dehydrogenase [ubiquinone] iron-sulfur protein 3                        | <i>Ndufs3</i> | 0.94        | 1.09 | 1.01 | 1.09                       | 0.74           |
| NADH dehydrogenase [ubiquinone] iron-sulfur protein 2                        | <i>Ndufs2</i> | 1.00        | 1.04 | 1.03 | 1.04                       | 0.65           |
| CDGSH iron-sulfur domain-containing protein 1                                | <i>Cisd1</i>  | 0.90        | 0.97 | 0.98 | 1.03                       | 0.14           |
| NADH dehydrogenase [ubiquinone] iron-sulfur protein 8                        | <i>Ndufs8</i> | 0.91        | 0.96 | 0.82 | 0.75                       | 0.0012         |
| Succinate dehydrogenase [ubiquinone] iron-sulfur subunit                     | <i>Sdhb</i>   | 0.86        | 0.99 | 0.92 | 0.99                       | 0.036          |
| NADH dehydrogenase [ubiquinone] iron-sulfur protein 7                        | <i>Ndufs7</i> | 1.00        | 1.14 | 1.09 | 1.20                       | 0.012          |
| NADH dehydrogenase [ubiquinone] iron-sulfur protein 4                        | <i>Ndufs4</i> | 0.94        | 1.12 | 1.10 | 1.23                       | 0.033          |
| NFU1 iron-sulfur cluster scaffold relative homolog                           | <i>Nfu1</i>   | 0.82        | 0.98 | 0.90 | 1.01                       | 0.13           |
| NFU1 iron-sulfur cluster scaffold relative homolog, mitochondrial (Fragment) | <i>Nfu1</i>   | 0.82        | 0.99 | 0.87 | 0.96                       | 0.059          |
| Iron-sulfur protein NUBPL                                                    | <i>Nubpl</i>  | 1.27        | 1.77 | 1.37 | 0.91                       | 0.067          |
| Iron-sulfur cluster assembly enzyme                                          | <i>Iscu</i>   | 0.95        | 1.01 | 0.96 | 0.98                       | 0.84           |
| NADH dehydrogenase [ubiquinone] iron-sulfur protein 6                        | <i>Ndufs6</i> | 0.94        | 0.96 | 0.86 | 0.82                       | 0.13           |
| NADH dehydrogenase [ubiquinone] iron-sulfur protein 5                        | <i>Ndufs5</i> | 0.87        | 0.97 | 0.91 | 1.03                       | 0.22           |
| CDGSH iron-sulfur domain-containing protein 2                                | <i>Cisd2</i>  | 0.90        | 0.88 | 0.89 | 0.82                       | 0.94           |
| Iron-responsive element-binding protein                                      | <i>Ireb2</i>  | 1.19        | 1.21 | 1.42 | 1.28                       | 0.039          |
| 2-oxoglutarate and iron-dependent oxygenase domain-containing protein 2      | <i>Ogfod2</i> | 1.11        | 0.97 | 1.15 | 0.99                       | 0.51           |
| Probable cytosolic iron-sulfur protein assembly protein                      | <i>Ciao1</i>  | 0.96        | 1.03 | 0.98 | 1.12                       | 0.10           |
| Iron-sulfur cluster assembly 2 homolog, mitochondrial                        | <i>Isca2</i>  | 0.90        | 0.91 | 1.13 | 1.02                       | 0.20           |
| CDGSH iron-sulfur domain-containing protein 3                                | <i>Cisd3</i>  | 0.84        | 0.88 | 1.02 | 1.07                       | 0.060          |
| 2-oxoglutarate and iron-dependent oxygenase domain-containing protein 3      | <i>Ogfod3</i> | 1.03        | 0.98 | 0.91 | 0.87                       | 0.25           |
| Aldehyde oxidase 1                                                           | <i>Aox1</i>   | 1.30        | 0.82 | 1.65 | 1.48                       | 0.0023         |
| Xanthine dehydrogenase/oxidase                                               | <i>Xdh</i>    | 0.70        | 0.70 | 0.75 | 0.98                       | 0.0079         |

INH, isoniazid; RIF, rifampicin; RIF/INH, rifampicin and isoniazid.

**Supplementary Table S8.** Relative change in [Fe-S] cluster assembly machinery proteins.

| Protein                                                                      | Gene           | <i>hPXR</i> |      |      | <i>mPxr</i> <sup>-/-</sup> |                |
|------------------------------------------------------------------------------|----------------|-------------|------|------|----------------------------|----------------|
|                                                                              |                | RIF/INH     | INH  | RIF  | RIF/INH                    | <i>p</i> Value |
| Cysteine desulfurase                                                         | <i>Nfs1</i>    | 0.89        | 0.96 | 0.84 | 0.90                       | 0.042          |
| Isoform 2 of Low molecular weight phosphotyrosine protein phosphatase        | <i>Acp1</i>    | 0.96        | 0.98 | 1.03 | 1.00                       | 0.63           |
| Frataxin, mitochondrial                                                      | <i>Fxn</i>     | 0.84        | 0.98 | 0.89 | 0.88                       | 0.11           |
| Ferredoxin-relative anticodon-binding domain-containing protein 1 homolog    | <i>Fdxacb1</i> | 1.06        | 0.96 | 1.09 | 1.15                       | 0.94           |
| Adrenodoxin                                                                  | <i>Fdx1</i>    | 0.64        | 0.77 | 0.84 | 0.79                       | 0.0016         |
| NADPH:adrenodoxin oxidoreductase,                                            | <i>Fdxr</i>    | 0.83        | 0.93 | 0.85 | 0.91                       | 0.16           |
| Stress-70 protein                                                            | <i>Hspa9</i>   | 1.07        | 1.07 | 0.94 | 1.05                       | 0.32           |
| Iron-sulfur cluster co-chaperone protein                                     | <i>Hscb</i>    | 1.23        | 1.20 | 1.40 | 1.44                       | 0.0056         |
| GrpE protein homolog 2, mitochondrial                                        | <i>Grpel2</i>  | 1.24        | 1.18 | 1.04 | 1.19                       | 0.78           |
| GrpE protein homolog 1                                                       | <i>Grpel1</i>  | 1.10        | 1.07 | 0.98 | 1.05                       | 0.69           |
| Glutaredoxin-related protein 5                                               | <i>Glr5</i>    | 1.60        | 1.69 | 1.24 | 1.39                       | 0.078          |
| Iron-sulfur cluster assembly 1 homolog                                       | <i>Isca1</i>   | 0.76        | 0.68 | 0.66 | 0.81                       | 0.0037         |
| Iron-sulfur cluster assembly 2 homolog                                       | <i>Isca2</i>   | 0.90        | 0.91 | 1.13 | 1.02                       | 0.20           |
| Putative transferase CAF17 homolog                                           | <i>Iba57</i>   | 1.00        | 0.98 | 1.15 | 1.14                       | 0.0090         |
| NFU1 iron-sulfur cluster scaffold relative homolog                           | <i>Nfu1</i>    | 0.82        | 0.98 | 0.90 | 1.01                       | 0.13           |
| NFU1 iron-sulfur cluster scaffold relative homolog, mitochondrial (Fragment) | <i>Nfu1</i>    | 0.82        | 0.99 | 0.87 | 0.96                       | 0.059          |
| BolA-like protein 3                                                          | <i>Bola3</i>   | 0.89        | 0.91 | 1.12 | 1.03                       | 0.012          |
| Iron-sulfur protein                                                          | <i>Nubpl</i>   | 1.27        | 1.77 | 1.37 | 0.91                       | 0.067          |
| Cytosolic Fe-S cluster assembly factor                                       | <i>Nubp1</i>   | 1.07        | 0.91 | 0.94 | 1.03                       | 0.33           |
| Cytosolic Fe-S cluster assembly factor                                       | <i>Nubp2</i>   | 1.03        | 1.06 | 1.01 | 1.14                       | 0.35           |
| Anamorsin                                                                    | <i>Ciapin1</i> | 1.28        | 1.19 | 1.34 | 1.10                       | 0.0095         |
| BolA-like protein 2                                                          | <i>Bola2</i>   | 0.98        | 0.90 | 0.92 | 0.88                       | 0.58           |
| Cytosolic Fe-S cluster assembly factor                                       | <i>Narfl</i>   | 1.00        | 1.01 | 1.06 | 1.01                       | 0.65           |
| Probable cytosolic iron-sulfur protein assembly protein                      | <i>Ciao1</i>   | 0.96        | 1.03 | 0.98 | 1.12                       | 0.10           |
| MMS19 nucleotide excision repair protein homolog                             | <i>Mms19</i>   | 0.96        | 0.96 | 0.97 | 1.07                       | 0.22           |

INH, isoniazid; RIF, rifampicin; RIF/INH, rifampicin and isoniazid.



**Supplementary Table S9.** Relative change in proteins associated with vitamin B<sub>6</sub> metabolism.

| Protein                                                       | Gene          | <i>hPXR</i> |      |      | <i>mPxr</i> <sup>-/-</sup> | <i>p</i> Value |
|---------------------------------------------------------------|---------------|-------------|------|------|----------------------------|----------------|
|                                                               |               | RIF/INH     | INH  | RIF  | RIF/INH                    |                |
| Pyridoxal kinase                                              | <i>Pdxk</i>   | 1.07        | 1.05 | 1.13 | 1.17                       | 0.75           |
| Pyridoxal phosphate phosphatase                               | <i>Pdpx</i>   | 1.49        | 0.95 | 2.18 | 1.34                       | 0.00049        |
| Pyridoxal-dependent decarboxylase domain-containing protein 1 | <i>Pdxdc1</i> | 0.97        | 1.03 | 1.01 | 1.02                       | 0.84           |

INH, isoniazid; RIF, rifampicin; RIF/INH, rifampicin and isoniazid.

**Supplementary Table S10.** Relative change in proteins associated with homocysteine metabolism.

| Protein                                    | Gene         | <i>hPXR</i> |      |      | <i>mPxr<sup>-/-</sup></i> | <i>p</i> Value |
|--------------------------------------------|--------------|-------------|------|------|---------------------------|----------------|
|                                            |              | RIF/INH     | INH  | RIF  | RIF/INH                   |                |
| Methionine synthase                        | <i>Mtr</i>   | 1.08        | 1.02 | 1.26 | 1.11                      | 0.045          |
| Methylenetetrahydrofolate reductase        | <i>Mthfr</i> | 0.96        | 0.96 | 0.82 | 1.19                      | 0.097          |
| Cystathionine gamma-lyase                  | <i>Cth</i>   | 1.06        | 0.87 | 0.97 | 1.50                      | 0.0081         |
| Cystathionine beta-synthase                | <i>Cbs</i>   | 0.62        | 0.81 | 0.62 | 0.76                      | 0.00375        |
| Betaine homocysteine S-methyltransferase 1 | <i>Bhmt</i>  | 1.29        | 1.21 | 1.21 | 1.99                      | 0.0229         |

INH, isoniazid; RIF, rifampicin; RIF/INH, rifampicin and isoniazid.

**Supplementary Table S11.** Relative change in proteins associated with tryptophan metabolism.

| Protein                                                | Gene         | <i>hPXR</i> |      |      | <i>mPxr</i> <sup>-/-</sup> |                |
|--------------------------------------------------------|--------------|-------------|------|------|----------------------------|----------------|
|                                                        |              | RIF/INH     | INH  | RIF  | RIF/INH                    | <i>p</i> Value |
| Tryptophan 2,3-dioxygenase                             | <i>Tdo2</i>  | 0.89        | 0.94 | 0.96 | 0.86                       | 0.93           |
| Kynurenine formamidase                                 | <i>Afmid</i> | 1.05        | 0.95 | 1.09 | 1.10                       | 0.53           |
| Indoleamine 2,3-dioxygenase 2                          | <i>Ido2</i>  | 0.93        | 0.79 | 0.81 | 1.00                       | 0.052          |
| 3-hydroxyanthranilate 3,4-dioxygenase                  | <i>Haa0</i>  | 0.91        | 0.99 | 0.91 | 1.14                       | 0.0077         |
| Kynurenine/alpha-aminoadipate aminotransferase         | <i>Aadat</i> | 0.62        | 0.74 | 0.56 | 0.79                       | 0.0014         |
| Kynurenine 3-monooxygenase                             | <i>Kmo</i>   | 0.82        | 0.91 | 0.78 | 1.11                       | 0.016          |
| Kynureninase                                           | <i>Kynu</i>  | 1.00        | 0.98 | 1.09 | 1.15                       | 0.057          |
| Kynurenine--oxoglutarate transaminase                  | <i>Ccbl1</i> | 0.82        | 0.83 | 0.79 | 0.71                       | 0.12           |
| 2-amino-3-carboxymuconate-6-semialdehyde decarboxylase | <i>Acmsd</i> | 0.83        | 0.57 | 0.80 | 0.72                       | 0.09           |
| Nicotinate phosphoribosyltransferase                   | <i>Naprt</i> | 0.87        | 0.98 | 0.83 | 0.79                       | 0.0062         |

INH, isoniazid; RIF, rifampicin; RIF/INH, rifampicin and isoniazid.

**Supplementary Table S12.** Protein changes by mouse strain.

| Decreased        |                                 |           | Increased        |                                 |         |
|------------------|---------------------------------|-----------|------------------|---------------------------------|---------|
| <i>hPXR</i> only | <i>mPxr</i> <sup>-/-</sup> only | Both      | <i>hPXR</i> only | <i>mPxr</i> <sup>-/-</sup> only | Both    |
| ABCB7            | ABCC8                           | AADAT     | ABCC4            | AADAC                           | AAMDC   |
| ACAA2            | ABHD1                           | AASS      | ABHD1            | ACAD9                           | ABCB1A  |
| ACADSB           | ACTN1                           | ABCA3     | ACACA            | ACNAT1                          | ABCC3   |
| ACADVL           | ACY1                            | ABCA6     | ACAD11           | ACNAT2                          | ABCD1   |
| AGFG2            | ADCK4                           | ABCC2     | AKR1B10          | ACP6                            | ABCD2   |
| ALDH6A1          | AKR1B1                          | ABCC6     | AKR1B8           | ADAL                            | ABCD3   |
| ANKRD26          | ALOX12                          | ABCG5     | ALB              | AGT                             | ABHD4   |
| ARG1             | ALOX12E                         | ABCG8     | ALOX12           | AHR                             | ABHD5   |
| ARPC3            | ANO6                            | ACSM5     | ALPL             | AK3                             | ABL1    |
| ASPDH            | ANPEP                           | AKR1C13   | AMN1             | AKR1A1                          | ACAA1A  |
| ASS1             | APRT                            | AKR1C19   | AMY2             | ALAS2                           | ACAA1B  |
| ATG4B            | ARHGAP1                         | ALCAM     | ANXA7            | ANKRD26                         | ACOT1   |
| ATP11A           | ARHGAP12                        | AMT       | APOA1            | ARFGAP1                         | ACOT2   |
| ATP11C           | ARHGAP27                        | AOX2      | APOM             | ARMC6                           | ACOT3   |
| ATP5J2           | ARHGEF40                        | AOX3      | APP              | ATP5I                           | ACOT4   |
| BCO1             | ARPC4                           | ARHGEF10L | APRT             | BCKDK                           | ACOT6   |
| BLVRA            | ASPA                            | ARPC1B    | ARL6IP6          | BLOC1S1                         | ACOT8   |
| C1QBP            | ASPG                            | ASAH1     | ASRGL1           | BLOC1S5                         | ACOX2   |
| CARS2            | ATP6V1B2                        | ATP12A    | ATG16L2          | BOLA1                           | ACSS3   |
| CCBL2            | ATP6V1C1                        | ATP1A1    | ATOX1            | BRAT1                           | ACTR1B  |
| CCDC58           | ATP6V1E1                        | ATP1A3    | BCAP31           | CA5A                            | ACYP2   |
| CCDC8            | ATP6V1F                         | ATP1B1    | BLVRB            | CBX8                            | ADIPOR2 |
| CDK2             | BPIFA2                          | ATP8B1    | BNIP1            | CCDC174                         | AFM     |
| CECR5            | BSN                             | ATP8B3    | BPIFA2           | CCND3                           | AGPAT9  |
| CHIL3            | CA1                             | AVIL      | CACYBP           | CD81                            | AIFM2   |
| CHST13           | CA8                             | BC029214  | CAT              | CHCHD3                          | AKR1B7  |
| CLCN4            | CCDC124                         | BCL2L1    | CBR1             | CHCHD7                          | AKR1D1  |
| CLCN5            | CCDC85C                         | BDH2      | CBR3             | CLOCK                           | ALDH1A1 |
| CMC4             | CD1D1                           | CAD       | CCDC124          | COX16                           | ALDH1A2 |
| CML1             | CD74                            | CARKD     | CCDC137          | CTAGE5                          | ALDH1A3 |
| CML2             | CEL                             | CASP3     | CD5L             | CTH                             | ALDH1A7 |
| COX6A1           | CELA2A                          | CBS       | CD74             | CYB5B                           | ALDH3A2 |
| COX6B1           | CES2A                           | CCDC53    | CDA              | CYHR1                           | ANAPC4  |
| CPS1             | CES2B                           | CCDC93    | CEL              | CYP2C40                         | ANGPTL3 |
| CYB5R1           | CES2G                           | CCT8L1    | CELA2A           | CYP2C67                         | ANO10   |
| CYP2C40          | CIRBP                           | CD163     | CES1D            | CYP2C68                         | ANXA5   |
| CYP2C67          | CLEC3B                          | CD177     | CES2A            | CYP2C69                         | AOX1    |

| Decreased        |                                 |         | Increased        |                                 |          |
|------------------|---------------------------------|---------|------------------|---------------------------------|----------|
| <i>hPXR</i> only | <i>mPxr</i> <sup>-/-</sup> only | Both    | <i>hPXR</i> only | <i>mPxr</i> <sup>-/-</sup> only | Both     |
| CYP2C68          | COL5A2                          | CD300LD | CES2B            | D2WSU81E                        | APOA2    |
| CYP2C69          | COL6A1                          | CDH1    | CES5A            | DCTN3                           | APOA4    |
| CYP4F14          | COL6A2                          | CEBPB   | CHMP5            | DCTN4                           | APOB     |
| DBT              | COL6A3                          | CES3B   | CHP1             | DEF8                            | APOC1    |
| DCPS             | COL6A5                          | CHSY3   | CIAPIN1          | DOLPP1                          | APOC4    |
| DDI2             | CPA1                            | CNP     | CMAS             | DPYD                            | APOE     |
| DHRS11           | CRTAP                           | COQ3    | CNIH4            | DTNBP1                          | APOF     |
| EBP              | CTRB1                           | COQ5    | COL1A1           | DTX3L                           | APOH     |
| ERBB2            | CTSA                            | COQ6    | COL1A2           | EBP                             | ARL2     |
| ETFB             | CYFIP2                          | COQ7    | COL4A1           | EEF1E1                          | ARPP19   |
| FAHD1            | CYP2C29                         | CPNE2   | COL4A2           | EIF2AK4                         | ATP2C1   |
| FAN1             | CYP2C38                         | CTSF    | COL5A2           | ESRP1                           | ATP9A    |
| FOXRED1          | CYP2C39                         | CYP1A1  | COL6A5           | FAM126A                         | AURKAIP1 |
| GALT             | CYP2C55                         | CYP1A2  | CP               | FAM169B                         | BC027231 |
| GATM             | DFFB                            | CYP27A1 | CPA1             | FAM173B                         | BET1     |
| GCSH             | DGCR6                           | CYP2D26 | CPN2             | FAM210A                         | BHMT     |
| GJB1             | DHPS                            | CYP2F2  | CREB3L3          | FBXL17                          | BLOC1S4  |
| GLS2             | DHRS9                           | CYP2U1  | CREG1            | FBXW5                           | BSDC1    |
| GLUD1            | DIO1                            | CYP4B1  | CTRB1            | FCN1                            | C4BPA    |
| GNE              | DKC1                            | DEGS1   | CYP2A4           | FHIT                            | CAPG     |
| GSDMDC1          | DLC1                            | DNAJA4  | CYP2A5           | FOCAD                           | CCDC86   |
| HDAC6            | DLG2                            | DYNC111 | CYP2B10          | FV4                             | CCDC91   |
| HIP1R            | DNAJC10                         | EGFR    | CYP2C29          | G6PC                            | CD36     |
| HMG5             | DNM2                            | ENPP1   | CYP2C38          | GANC                            | CDC34    |
| INSC             | ECE1                            | EPB4    | CYP2C39          | GATM                            | CDK5RAP1 |
| ISYNA1           | EML4                            | EPB41L5 | CYP2C55          | GBAS                            | CDK6     |
| KEG1             | EPN2                            | ERP44   | CYP3A59          | GCH1                            | CDKN2C   |
| KIFAP3           | FAM69A                          | FABP5   | D8ERTD738E       | GIMD1                           | CENPV    |
| KMO              | FARP1                           | FAM210B | DAPK2            | GIPC1                           | CES1     |
| LASP1            | FAT3                            | FDX1    | DDAH1            | GJB2                            | CES1B    |
| LDHA             | FBXW9                           | FECH    | DERL1            | GLB1                            | CES1C    |
| LETM1            | FERMT3                          | FEZ2    | DGKE             | GLB1L                           | CGRRF1   |
| LETMD1           | FHOD1                           | FGFR1   | DHX37            | GLDC                            | CHCHD6   |
| MCCC1            | FUOM                            | FGFR2   | DLAT             | GLRX2                           | CIDEB    |
| MCCC2            | G6PDX                           | FGFR3   | DMPK             | GLS2                            | CMBL     |
| MMGT1            | GALNT11                         | FRRS1   | DNAJA2           | GLYCTK                          | COA3     |
| MOCS1            | GFPT1                           | FSCN1   | DUSP3            | GM20441                         | CPPED1   |
| MRRF             | GLOD4                           | FTL1    | DYNC1LI2         | GNMT                            | CRAT     |

| Decreased        |                                 |          | Increased        |                                 |           |
|------------------|---------------------------------|----------|------------------|---------------------------------|-----------|
| <i>hPXR</i> only | <i>mPxr</i> <sup>-/-</sup> only | Both     | <i>hPXR</i> only | <i>mPxr</i> <sup>-/-</sup> only | Both      |
| MT-ATP6          | GM11992                         | GBA      | ECHDC1           | GPHN                            | CRCP      |
| MT-CO3           | GM28048                         | GDPGP1   | EMG1             | GULO                            | CRP       |
| MTFR1L           | GMFB                            | GM14434  | F12              | H2-T23                          | CUEDC2    |
| MTND3            | GP5                             | GM17296  | F13B             | HAO1                            | CYB5A     |
| NADK2            | GPI                             | GM4450   | FAM192A          | HIRA                            | CYB5R3    |
| NAT8             | GRTP1                           | GMPR     | FBXW9            | HSD17B10                        | CYP2E1    |
| NDUFAF2          | GSTA4                           | GPR155   | FGB              | HUS1                            | CYP3A11   |
| NDUFAF5          | GSTO2                           | HAL      | FHAD1            | ISOC2B                          | CYP3A16   |
| NDUFAF6          | H13                             | HDHD3    | FKBP1A           | ITFG1                           | CYP3A25   |
| NINJ1            | H2-AB1                          | HGSNAT   | FMNL2            | KCNH8                           | CYP3A41A  |
| NME3             | H2-DMB1                         | HM13     | FN1              | LARS2                           | CYP3A44   |
| NMNAT3           | H2-EB1                          | HMGB3    | FUT8             | LGALS8                          | CYP3A57   |
| NNMT             | HMHA1                           | HOGA1    | GALE             | LIN7C                           | CYP4A10   |
| NOSTRIN          | HNF1A                           | HPSE     | GP1BA            | LNP                             | CYP4A14   |
| NR5A2            | HNRNPD                          | HSD17B2  | GP5              | LRRC20                          | CYP4A31   |
| OTC              | HSP90B1                         | HSD3B4   | GP9              | LRSAM1                          | CYP4A32   |
| PACSIN3          | HYAL1                           | HSD3B5   | GSN              | MAPKAPK3                        | CYP8B1    |
| PAH              | ICMT                            | ICAM1    | GSTA4            | MAR1                            | D17WSU92E |
| PAK7             | IDUA                            | IGJ      | GSTM5            | MAST2                           | D2HGDH    |
| PCBD2            | IGHA                            | ISCA1    | GSTT2            | MAT2A                           | DCTN1     |
| PCDH1            | IGHV1-4                         | IVD      | H2-AB1           | MCC                             | DDX52     |
| PLXNB1           | IGHV1-62-2                      | JAKMIP3  | H2-DMB1          | MCEE                            | DECR2     |
| PNKD             | IGHV5-4                         | KBTBD4   | H2-EB1           | METTL17                         | DENND1B   |
| POLG2            | IGHV7-2                         | KIAA0195 | HAUS3            | MIA2                            | DHCR24    |
| POLR2H           | IGLC2                           | LIPO1    | HGFAC            | MIPEP                           | DHDDS     |
| PPT1             | IMPA1                           | LPIN1    | HNRNPM           | MKNK1                           | DHRS7B    |
| PRODH            | INMT                            | LRP1     | HOPX             | MME                             | DLG5      |
| PRODH2           | INPP5F                          | LRP1B    | HSPB1            | MPDZ                            | DNAH7B    |
| PTDSS1           | IPO9                            | LTF      | ICA              | MPST                            | DNAJB2    |
| PTMS             | ITGA7                           | MANBA    | IFI27L2B         | MRPL1                           | EEPD1     |
| PTPMT1           | KCNN2                           | MCU      | IFIT1            | MRPL21                          | EGLN1     |
| PTPRS            | KDM1A                           | MICU1    | IGHV1-9          | MRPL40                          | EHHADH    |
| RING1            | KDR                             | MIER1    | IGHV7-2          | MRPS11                          | EIF4ENIF1 |
| S100A1           | KIF5B                           | MMP9     | IGLC2            | MRPS17                          | ELOVL6    |
| SARS2            | KLC2                            | MOXD1    | IGSF5            | MRPS22                          | ENSA      |
| SLC1A2           | KLC4                            | MT-CO1   | ITGA2B           | MRPS24                          | ENTPD5    |
| SLC22A1          | LRRC32                          | MTHFD2L  | ITIH1            | MRPS30                          | EPHX1     |
| SLC25A12         | LRRC47                          | MYO1B    | KIAA0100         | MRPS36                          | ERMP1     |

| Decreased        |                                 |          | Increased        |                                 |         |
|------------------|---------------------------------|----------|------------------|---------------------------------|---------|
| <i>hPXR</i> only | <i>mPxr</i> <sup>-/-</sup> only | Both     | <i>hPXR</i> only | <i>mPxr</i> <sup>-/-</sup> only | Both    |
| SLC25A15         | LSR                             | NAAA     | KIF21A           | MRPS7                           | F10     |
| SLC25A25         | LTA4H                           | NAGA     | KLHDC10          | MRPS9                           | F2      |
| SLC25A45         | MAN2B1                          | NAGLT1A  | KLKB1            | MSRB2                           | FAAP100 |
| SLC25A48         | MAN2B2                          | NAGLU    | KNG1             | MTAP                            | FAM175B |
| SLC25A51         | MAP1S                           | NAPSA    | KNG2             | MTCH1                           | FAM185A |
| SLC26A1          | MAP3K15                         | NASP     | LGALS3           | MTND3                           | FAM195A |
| SLC35A3          | MARK4                           | NDST1    | LPIN3            | MTX1                            | FAM32A  |
| SLC8A2           | MBNL1                           | NFIX     | LRRC32           | MYEF2                           | FAM73B  |
| SLCO1A1          | MOV10                           | NGP      | LTBP1            | NAA25                           | FDFT1   |
| SLCO2B1          | MPP7                            | NPC1     | MAPRE3           | NAGS                            | FER1L6  |
| SNAP25           | MRI1                            | NPHP3    | MARCH6           | NANP                            | FITM2   |
| SRRM2            | MST1                            | PALD1    | MGLL             | NAV2                            | FKBP8   |
| STX11            | MX1                             | PCBP4    | MICAL2           | NDRG2                           | FKBPL   |
| SUCLA2           | MX2                             | PCK2     | MMRN1            | NDUFA5                          | FMO1    |
| SULT2A4          | MYO1A                           | PGAP1    | MST1             | NDUFA7                          | FMO5    |
| TAT              | MYT1L                           | PGLYRP1  | MSTO1            | NDUFAF7                         | FMO9    |
| THEM4            | NAPRT                           | PGPEP1   | MVP              | NDUFB11                         | FOXP1   |
| TIMM10B          | NCBP1                           | PHLDA1   | MYO19            | NDUFB9                          | GALK1   |
| TIMM44           | NDRG1                           | PLA2G12B | MYO1A            | NDUFS1                          | GDE1    |
| TMEM11           | NDUFB5                          | PLBD1    | MYO5B            | NDUFS4                          | GGCT    |
| TMEM126A         | NDUFS8                          | PLBD2    | NAA20            | NDUFS7                          | GM10639 |
| TMEM201          | NOS3                            | PNP      | NADK             | NMNAT3                          | GM4952  |
| TMEM261          | NT5C3B                          | PPOX     | NAGK             | NT5DC1                          | GM4978  |
| TRAPPC5          | NUDT16                          | PTGES2   | NCEH1            | NUDT2                           | GNPAT   |
| TSPAN31          | OSBPL1A                         | PTGS2    | NCF1             | OMA1                            | GPAM    |
| TSPAN33          | OSGEP                           | PTPRF    | NCLN             | PACS2                           | GPT2    |
| TTC23L           | OVCA2                           | PYROXD2  | NEB              | PANK1                           | GPX4    |
| TTN              | PAPSS1                          | RAB24    | NEBL             | PDE4C                           | GPX7    |
| TVP23B           | PARP3                           | RASSF3   | NMT2             | PEBP1                           | GRIN3B  |
| UQCRC1           | PEPD                            | RBM33    | NOMO1            | PEX12                           | GSTA1   |
| UQCRH            | PET117                          | RER1     | NOS2             | PI4KA                           | GSTM1   |
| URAD             | PF4                             | RETN     | NRDE2            | PLEKHA3                         | GSTM2   |
| USP46            | PFAS                            | RETNLG   | PEX11G           | PLXNB1                          | GSTM3   |
| VDAC3            | PFKM                            | RNASET2  | PF4              | PPCDC                           | GSTM4   |
| XDH              | PGAM5                           | S100A9   | PGRMC2           | PPFIBP2                         | GSTM6   |
| XPNPEP3          | PHF6                            | SDC4     | PIGX             | PRKACA                          | GSTM7   |
| ZBTB7B           | PHYKPL                          | SDHD     | PLA2G7           | PRKCZ                           | GSTT3   |
| ZDHHC20          | PLCB1                           | SDSL     | PLEK             | PRKD2                           | GZF1    |

| Decreased        |                                 |          | Increased        |                                 |          |
|------------------|---------------------------------|----------|------------------|---------------------------------|----------|
| <i>hPXR</i> only | <i>mPxr</i> <sup>-/-</sup> only | Both     | <i>hPXR</i> only | <i>mPxr</i> <sup>-/-</sup> only | Both     |
| ZNF830           | PLCB3                           | SELENBP1 | PLEKHA1          | PRKRA                           | H1F0     |
|                  | PLSCR1                          | SELENBP2 | PNLIP            | PTPMT1                          | H2-Q10   |
|                  | PNKP                            | SENP6    | PNLIPRP1         | PXMP2                           | H3F3A    |
|                  | PNLIP                           | SIAE     | POLR1E           | RBM17                           | HIST1H1A |
|                  | PODXL                           | SLC12A9  | POR              | RDH10                           | HIST1H1B |
|                  | POLR2I                          | SLC17A3  | PPFIBP1          | RDH5                            | HIST1H1C |
|                  | PPFIBP1                         | SLC22A7  | PRKCA            | RMDN2                           | HIST1H1E |
|                  | PPIC                            | SLC25A37 | PROZ             | RNF14                           | HIST1H3A |
|                  | PPP1R37                         | SLC29A1  | PSAT1            | RPP25L                          | HIST1H3B |
|                  | PRKAB2                          | SLC2A4   | PSMD5            | RRP1B                           | HMGCS1   |
|                  | PSIP1                           | SLC30A1  | PXMP4            | SAMD4B                          | HMGCS2   |
|                  | PSME1                           | SLC35A2  | PZP              | SEC16A                          | HPGD     |
|                  | PTMA                            | SLC39A14 | REEP5            | SERAC1                          | HSCB     |
|                  | PYGB                            | SLC6A12  | REEP6            | SERPING1                        | HSD17B12 |
|                  | R3HCC1                          | SMIM12   | RFX5             | SIRT2                           | HSD17B4  |
|                  | R3HDM2                          | SMPD1    | RGL2             | SLC1A2                          | HSD17B7  |
|                  | RAB11FIP1                       | ST3GAL4  | RIN2             | SLC25A35                        | HTATIP2  |
|                  | RAB13                           | STARD3   | RNF185           | SLC35A3                         | IGHV5-12 |
|                  | RAB3A                           | STEAP3   | ROBO1            | SLCO1A1                         | IL1RAP   |
|                  | RAB3C                           | STOML2   | RPF2             | STARD10                         | IMMT     |
|                  | RAD21                           | STXBP5L  | RPIA             | SUGCT                           | IREB2    |
|                  | RELN                            | TAF12    | RPL18            | SULT5A1                         | ITPKB    |
|                  | RGS16                           | TCIRG1   | RPL22L1          | TACO1                           | KANSL3   |
|                  | RIOK3                           | TGM1     | RPS25            | TCAIM                           | KDSR     |
|                  | RNF181                          | TMEM14C  | SAV1             | TM7SF2                          | LAMA1    |
|                  | ROBO1                           | TMEM167B | SDC1             | TMEM102                         | LGALS1   |
|                  | RP2                             | TMEM30A  | SERPINA1B        | TMEM135                         | LHPP     |
|                  | RPS16                           | TPST1    | SERPINA1D        | TMEM2                           | MAN2C1   |
|                  | RTKN                            | TRAM1    | SERPINA6         | TMEM260                         | MAPKAPK5 |
|                  | RUNDC1                          | TSC22D1  | SERPINB1A        | TMX2                            | MASP2    |
|                  | RWDD1                           | TSC22D2  | SERPINB1C        | TSR2                            | MAT1A    |
|                  | SAG                             | TSC22D3  | SERPINB6B        | TTC39B                          | ME1      |
|                  | SART3                           | TSC22D4  | SERPINC1         | TTC39C                          | METTL7B  |
|                  | SCARB2                          | TTC19    | SERPINF1         | TXN                             | METTL9   |
|                  | SDC1                            | UBL3     | SERPINF2         | UGT3A1                          | MGME1    |
|                  | SEPHS1                          | UBXN7    | SLC23A2          | UGT3A2                          | MGMT     |
|                  | SERPINB1A                       | UQCC1    | SLCO1A4          | USP38                           | MGST1    |
|                  | SETD6                           | UQCC2    | SLPI             | ZFP219                          | MMP14    |



| Decreased        |                                 |        | Increased        |                                 |         |
|------------------|---------------------------------|--------|------------------|---------------------------------|---------|
| <i>hPXR</i> only | <i>mPxr</i> <sup>-/-</sup> only | Both   | <i>hPXR</i> only | <i>mPxr</i> <sup>-/-</sup> only | Both    |
|                  | SH3GLB1                         | UQCRQ  | SMAD2            | ZNF706                          | MRPL11  |
|                  | SIRT6                           | VAMP5  | SMTN             |                                 | MRPL30  |
|                  | SLC2A3                          | VPS37C | SNAP29           |                                 | MRPL35  |
|                  | SLPI                            | WDR20  | SPAST            |                                 | MRPL47  |
|                  | SMARCA2                         |        | SPP2             |                                 | MRPL57  |
|                  | SMC1A                           |        | SRCIN1           |                                 | MRPS12  |
|                  | SMS                             |        | ST3GAL5          |                                 | MRPS15  |
|                  | SNRPB2                          |        | SULT2A1          |                                 | MRPS18B |
|                  | SNW1                            |        | SYNE3            |                                 | MRPS21  |
|                  | SOAT2                           |        | SYNJ2            |                                 | MRPS25  |
|                  | SPAST                           |        | SYNPO            |                                 | MRPS35  |
|                  | SPTBN2                          |        | TCN2             |                                 | MTERF1A |
|                  | SRCIN1                          |        | TDRD7            |                                 | MTERF2  |
|                  | SRSF10                          |        | TDRKH            |                                 | MTG1    |
|                  | SSR3                            |        | TEP1             |                                 | N6AMT2  |
|                  | STAT2                           |        | THBS1            |                                 | NBEAL1  |
|                  | TIMP3                           |        | TIMM8B           |                                 | NEU1    |
|                  | TMA7                            |        | TIMP3            |                                 | NKTR    |
|                  | TMEM51                          |        | TMA7             |                                 | NOL3    |
|                  | TMEM87A                         |        | TMEM109          |                                 | NPRL3   |
|                  | TNKS1BP1                        |        | TMEM259          |                                 | NQO1    |
|                  | TOM1L2                          |        | TMEM51           |                                 | NSDHL   |
|                  | TPM4                            |        | TMX1             |                                 | NUDT12  |
|                  | TPRKB                           |        | TNFSF10          |                                 | OAT     |
|                  | TRAPPC1                         |        | TPM4             |                                 | OBFC1   |
|                  | TRIM28                          |        | TRUB2            |                                 | ODR4    |
|                  | TRMT11                          |        | TTC7             |                                 | OSBPL3  |
|                  | TRP53RK                         |        | TXNDC15          |                                 | P4HTM   |
|                  | TRY10                           |        | UBASH3B          |                                 | PAFAH2  |
|                  | TUBGCP3                         |        | UGGT2            |                                 | PANK2   |
|                  | U2AF2                           |        | UGT1A1           |                                 | PCTP    |
|                  | UBA5                            |        | UGT1A10          |                                 | PDK1    |
|                  | UBE2H                           |        | UGT1A7C          |                                 | PDK2    |
|                  | UBE2M                           |        | UGT2B34          |                                 | PDXP    |
|                  | UBIAD1                          |        | UGT2B35          |                                 | PEO1    |
|                  | UFC1                            |        | UGT2B36          |                                 | PEX10   |
|                  | ZNF511                          |        | UPP1             |                                 | PEX11A  |
|                  | ZWINT                           |        | USE1             |                                 | PEX13   |

| Decreased        |                                 |      | Increased        |                                 |         |
|------------------|---------------------------------|------|------------------|---------------------------------|---------|
| <i>hPXR</i> only | <i>mPxr</i> <sup>-/-</sup> only | Both | <i>hPXR</i> only | <i>mPxr</i> <sup>-/-</sup> only | Both    |
|                  |                                 |      | VNN3             |                                 | PEX14   |
|                  |                                 |      | WDR77            |                                 | PEX16   |
|                  |                                 |      | ZCCHC11          |                                 | PEX19   |
|                  |                                 |      | ZFPL1            |                                 | PEX2    |
|                  |                                 |      |                  |                                 | PEX26   |
|                  |                                 |      |                  |                                 | PEX3    |
|                  |                                 |      |                  |                                 | PEX6    |
|                  |                                 |      |                  |                                 | PGD     |
|                  |                                 |      |                  |                                 | PGLYRP2 |
|                  |                                 |      |                  |                                 | PGS1    |
|                  |                                 |      |                  |                                 | PITRM1  |
|                  |                                 |      |                  |                                 | PKHD1   |
|                  |                                 |      |                  |                                 | PLA2G6  |
|                  |                                 |      |                  |                                 | PLIN2   |
|                  |                                 |      |                  |                                 | PLIN4   |
|                  |                                 |      |                  |                                 | PLTP    |
|                  |                                 |      |                  |                                 | PNPLA2  |
|                  |                                 |      |                  |                                 | PNPLA3  |
|                  |                                 |      |                  |                                 | PNPLA8  |
|                  |                                 |      |                  |                                 | POMP    |
|                  |                                 |      |                  |                                 | PRUNE   |
|                  |                                 |      |                  |                                 | PSMG3   |
|                  |                                 |      |                  |                                 | PTK2B   |
|                  |                                 |      |                  |                                 | PTS     |
|                  |                                 |      |                  |                                 | PUSL1   |
|                  |                                 |      |                  |                                 | RAB30   |
|                  |                                 |      |                  |                                 | RAD1    |
|                  |                                 |      |                  |                                 | RARRES1 |
|                  |                                 |      |                  |                                 | RBFA    |
|                  |                                 |      |                  |                                 | RBM8    |
|                  |                                 |      |                  |                                 | RBM8A   |
|                  |                                 |      |                  |                                 | RBP4    |
|                  |                                 |      |                  |                                 | RDH16   |
|                  |                                 |      |                  |                                 | RDH9    |
|                  |                                 |      |                  |                                 | REXO2   |
|                  |                                 |      |                  |                                 | RPL14   |
|                  |                                 |      |                  |                                 | RPL24   |
|                  |                                 |      |                  |                                 | RPL28   |

| Decreased        |                                 |      | Increased        |                                 |           |
|------------------|---------------------------------|------|------------------|---------------------------------|-----------|
| <i>hPXR</i> only | <i>mPxr</i> <sup>-/-</sup> only | Both | <i>hPXR</i> only | <i>mPxr</i> <sup>-/-</sup> only | Both      |
|                  |                                 |      |                  |                                 | RPL35     |
|                  |                                 |      |                  |                                 | RPL4      |
|                  |                                 |      |                  |                                 | RPL6      |
|                  |                                 |      |                  |                                 | RPL7      |
|                  |                                 |      |                  |                                 | RPL7A     |
|                  |                                 |      |                  |                                 | RPL8      |
|                  |                                 |      |                  |                                 | RPS6KA1   |
|                  |                                 |      |                  |                                 | RRP36     |
|                  |                                 |      |                  |                                 | RSL1D1    |
|                  |                                 |      |                  |                                 | RTFDC1    |
|                  |                                 |      |                  |                                 | RTP4      |
|                  |                                 |      |                  |                                 | SDHAF1    |
|                  |                                 |      |                  |                                 | SECISBP2L |
|                  |                                 |      |                  |                                 | SERF2     |
|                  |                                 |      |                  |                                 | SERPINA7  |
|                  |                                 |      |                  |                                 | SHCBP1L   |
|                  |                                 |      |                  |                                 | SLAIN2    |
|                  |                                 |      |                  |                                 | SLC22A18  |
|                  |                                 |      |                  |                                 | SLC47A1   |
|                  |                                 |      |                  |                                 | SRXN1     |
|                  |                                 |      |                  |                                 | STAU2     |
|                  |                                 |      |                  |                                 | STRADB    |
|                  |                                 |      |                  |                                 | STS       |
|                  |                                 |      |                  |                                 | SVIP      |
|                  |                                 |      |                  |                                 | SYAP1     |
|                  |                                 |      |                  |                                 | TBCE      |
|                  |                                 |      |                  |                                 | TBCEL     |
|                  |                                 |      |                  |                                 | TECR      |
|                  |                                 |      |                  |                                 | TEX2      |
|                  |                                 |      |                  |                                 | THRSP     |
|                  |                                 |      |                  |                                 | TKT       |
|                  |                                 |      |                  |                                 | TMCC3     |
|                  |                                 |      |                  |                                 | TMEM120A  |
|                  |                                 |      |                  |                                 | TMEM147   |
|                  |                                 |      |                  |                                 | TMEM205   |
|                  |                                 |      |                  |                                 | TMEM263   |
|                  |                                 |      |                  |                                 | TMLHE     |
|                  |                                 |      |                  |                                 | TMPRSS11B |

| Decreased        |                                 |      | Increased        |                                 |         |
|------------------|---------------------------------|------|------------------|---------------------------------|---------|
| <i>hPXR</i> only | <i>mPxr</i> <sup>-/-</sup> only | Both | <i>hPXR</i> only | <i>mPxr</i> <sup>-/-</sup> only | Both    |
|                  |                                 |      |                  |                                 | TOP1MT  |
|                  |                                 |      |                  |                                 | TPD52   |
|                  |                                 |      |                  |                                 | TRAK2   |
|                  |                                 |      |                  |                                 | TRIAP1  |
|                  |                                 |      |                  |                                 | TSSC4   |
|                  |                                 |      |                  |                                 | TTPA    |
|                  |                                 |      |                  |                                 | TTR     |
|                  |                                 |      |                  |                                 | TYW1    |
|                  |                                 |      |                  |                                 | UAP1L1  |
|                  |                                 |      |                  |                                 | UBE2L6  |
|                  |                                 |      |                  |                                 | UBXN4   |
|                  |                                 |      |                  |                                 | UCK1    |
|                  |                                 |      |                  |                                 | UCKL1   |
|                  |                                 |      |                  |                                 | UGDH    |
|                  |                                 |      |                  |                                 | UGT1A5  |
|                  |                                 |      |                  |                                 | UGT1A9  |
|                  |                                 |      |                  |                                 | UROS    |
|                  |                                 |      |                  |                                 | USP40   |
|                  |                                 |      |                  |                                 | USP45   |
|                  |                                 |      |                  |                                 | VNN1    |
|                  |                                 |      |                  |                                 | WDR34   |
|                  |                                 |      |                  |                                 | WDR73   |
|                  |                                 |      |                  |                                 | WWOX    |
|                  |                                 |      |                  |                                 | ZBTB21  |
|                  |                                 |      |                  |                                 | ZGPAT   |
|                  |                                 |      |                  |                                 | ZNF22   |
|                  |                                 |      |                  |                                 | ZNF804A |
|                  |                                 |      |                  |                                 | ZNHIT2  |

**Supplementary Table S13.** Proteins decreased by treatment in *hPXR* mice.

| <b>INH only</b> | <b>RIF only</b> | <b>RIF/INH</b> | <b>INH and RIF only, but not RIF/INH</b> | <b>RIF only and RIF/INH, but not INH only</b> | <b>INH only and RIF/INH, but not RIF only</b> | <b>INH only, RIF only, and RIF/INH</b> |
|-----------------|-----------------|----------------|------------------------------------------|-----------------------------------------------|-----------------------------------------------|----------------------------------------|
| ABHD4           | AARSD1          | ACADVL         | ABHD1                                    | ABCA6                                         | ABCC2                                         | AADAT                                  |
| ACYP2           | ABCC8           | ALDH6A1        | AMY2                                     | ABCB7                                         | AKR1C13                                       | AASS                                   |
| AGPAT1          | ABCC9           | AMT            | ARHGAP27                                 | ABCC6                                         | AKR1C19                                       | ABCA3                                  |
| AKR1B8          | ACP6            | ANKRD26        | ARL6                                     | ACAA2                                         | COQ7                                          | ABCG5                                  |
| ALOX12E         | ACTN1           | ARPC3          | CEL                                      | ACADSB                                        | CYP1A1                                        | ABCG8                                  |
| ANPEP           | ACTN4           | ASPDH          | CELA2A                                   | ACSM5                                         | CYP1A2                                        | AOX2                                   |
| AOX1            | ADCK2           | ATG4B          | COL1A1                                   | AGFG2                                         | CYP2D26                                       | AOX3                                   |
| ARHGDI A        | AK2             | BDH2           | COL1A2                                   | ALCAM                                         | CYP4B1                                        | ARPC1B                                 |
| ATP6V1E1        | AKR1C21         | C1QBP          | COL5A2                                   | ARG1                                          | FECH                                          | ASAHI                                  |
| CD1D1           | AKR1C6          | CARKD          | COL6A1                                   | ARHGFEF10L                                    | GATM                                          | ASS1                                   |
| CES2C           | ALAS2           | CASP3          | COL6A2                                   | ATP11A                                        | KIAA0195                                      | ATP8B3                                 |
| CHID1           | ANO6            | CHST13         | COL6A3                                   | ATP11C                                        | PNKD                                          | AVIL                                   |
| CREG1           | AP2A1           | COQ3           | COL6A5                                   | ATP12A                                        | PPOX                                          | BC029214                               |
| CRTAP           | ARFGAP2         | COQ5           | CPA1                                     | ATP1A1                                        | PRODH2                                        | BCL2L1                                 |
| CYP2A12         | ATP13A1         | COQ6           | CTRB1                                    | ATP1A3                                        | PYROXD2                                       | CAD                                    |
| CYP2A22         | BRD3            | COX6A1         | CTSA                                     | ATP1B1                                        | SLC6A12                                       | CBS                                    |
| CYP2A4          | BRMS1           | COX6B1         | DGCR6                                    | ATP5J2                                        | TRAPPC5                                       | CCBL2                                  |
| CYP2A5          | CA5A            | DHRS11         | DHRS9                                    | ATP8B1                                        | TTC19                                         | CCDC53                                 |
| CYP2C55         | CA8             | FOXRED1        | FAT3                                     | BCO1                                          |                                               | CCDC8                                  |
| DDC             | CAMK1D          | GALT           | GM11992                                  | BLVRA                                         |                                               | CD163                                  |
| DLG2            | CCDC51          | HMGB3          | GRTP1                                    | CARS2                                         |                                               | CD177                                  |
| DNAJC10         | CCDC85B         | JAKMIP3        | GSTO2                                    | CCDC58                                        |                                               | CD300LD                                |
| DOPEY2          | CCDC85C         | MT-CO3         | ICMT                                     | CCDC93                                        |                                               | CDH1                                   |
| GFPT1           | CDKN2AIP        | MTND3          | IGHV1-4                                  | CCT8L1                                        |                                               | CEBPB                                  |
| GJB2            | CLCN3           | NADK2          | IGHV1-62-2                               | CDK2                                          |                                               | CES3B                                  |
| GM10639         | CLEC3B          | NDUFAF2        | IGHV5-4                                  | CECR5                                         |                                               | CHSY3                                  |
| GSTA4           | CMAH            | NDUFAF5        | ITGA7                                    | CHIL3                                         |                                               | CML2                                   |
| GSTM1           | CNPY4           | NDUFAF6        | KCTD12                                   | CLCN4                                         |                                               | CPS1                                   |
| GSTM2           | COL4A1          | NOSTRIN        | NAB2                                     | CLCN5                                         |                                               | CTSF                                   |
| GSTM4           | COPG1           | NPHP3          | PET117                                   | CMC4                                          |                                               | CYB5R1                                 |
| GSTM6           | COX7A2          | PNP            | PNLIP                                    | CML1                                          |                                               | CYP27A1                                |
| GSTM7           | CSTF2T          | POLR2H         | PODXL                                    | CNP                                           |                                               | CYP2C40                                |
| H2-AB1          | CTAGE5          | PTPMT1         | RNF25                                    | CPNE2                                         |                                               | CYP2C68                                |
| H2-DMB1         | CTNBL1          | RASSF3         | RP2                                      | CYP2C67                                       |                                               | CYP2C69                                |
| IDUA            | CYFIP2          | S100A1         | RWDD1                                    | DBT                                           |                                               | CYP2F2                                 |
| IFI27L2B        | DAB2            | SLC25A37       | SAG                                      | DCPS                                          |                                               | CYP2U1                                 |
| IMPACT          | DDX39A          | SLC25A45       | SLC43A3                                  | DDI2                                          |                                               | CYP4F14                                |

| <b>INH only</b> | <b>RIF only</b> | <b>RIF/INH</b> | <b>INH and RIF only, but not RIF/INH</b> | <b>RIF only and RIF/INH, but not INH only</b> | <b>INH only and RIF/INH, but not RIF only</b> | <b>INH only, RIF only, and RIF/INH</b> |
|-----------------|-----------------|----------------|------------------------------------------|-----------------------------------------------|-----------------------------------------------|----------------------------------------|
| ITPKB           | DDX39B          | SLC25A51       | SULT5A1                                  | DNAJA4                                        |                                               | DEGS1                                  |
| LGALS3          | DHODH           | SLC35A2        | TMEM106B                                 | EBP                                           |                                               | DYNC111                                |
| MAN2B2          | DHX38           | SLCO2B1        | TMEM41A                                  | EGFR                                          |                                               | ERP44                                  |
| MYT1L           | DHX9            | SNAP25         | UBE2H                                    | ENPP1                                         |                                               | FAM210B                                |
| NCF1            | DKC1            | TIMM10B        |                                          | EPB4                                          |                                               | FDX1                                   |
| NDRG1           | DLC1            | TMEM201        |                                          | EPB41L5                                       |                                               | FEZ2                                   |
| NOL3            | DNM2            | TTN            |                                          | ERBB2                                         |                                               | FGFR1                                  |
| PAK1            | DNM3            | TVP23B         |                                          | ETFB                                          |                                               | FRRS1                                  |
| PEPD            | DNPH1           | UQCRC1         |                                          | FABP5                                         |                                               | FSCN1                                  |
| PIR             | EAF1            | UQCRH          |                                          | FAHD1                                         |                                               | FTL1                                   |
| PLIN4           | ECE1            | VPS37C         |                                          | FAN1                                          |                                               | GBA                                    |
| PON1            | EMC4            |                |                                          | FGFR2                                         |                                               | GDPGP1                                 |
| RAB3A           | EMC6            |                |                                          | FGFR3                                         |                                               | GJB1                                   |
| RNF185          | EPB41L2         |                |                                          | GCSH                                          |                                               | GM14434                                |
| SHCBP1L         | EPHA3           |                |                                          | GLS2                                          |                                               | GM17296                                |
| TGM2            | EPN2            |                |                                          | GLUD1                                         |                                               | GPR155                                 |
| TMEM51          | FAM210A         |                |                                          | GM4450                                        |                                               | HAL                                    |
| TMEM87A         | FAM69A          |                |                                          | GMPR                                          |                                               | HDHD3                                  |
| TRAK2           | FERMT2          |                |                                          | GNE                                           |                                               | HGSNAT                                 |
| TRAPPC1         | FHOD1           |                |                                          | GSDMDC1                                       |                                               | HIP1R                                  |
| UAP1L1          | FOXO1           |                |                                          | HDAC6                                         |                                               | HM13                                   |
| UGDH            | FUOM            |                |                                          | HMGNS                                         |                                               | HOGA1                                  |
| UGT2B35         | FV4             |                |                                          | HSD3B4                                        |                                               | HPSE                                   |
| UGT2B36         | GCC1            |                |                                          | HSD3B5                                        |                                               | HSD17B2                                |
| ZNF804A         | GFRA1           |                |                                          | KEG1                                          |                                               | ICAM1                                  |
|                 | GIMAP4          |                |                                          | KIFAP3                                        |                                               | IGJ                                    |
|                 | GLDC            |                |                                          | KMO                                           |                                               | INSC                                   |
|                 | GM28048         |                |                                          | LASP1                                         |                                               | ISCA1                                  |
|                 | GOT2            |                |                                          | LDHA                                          |                                               | ISYNA1                                 |
|                 | GPRIN3          |                |                                          | LETM1                                         |                                               | IVD                                    |
|                 | HDAC1           |                |                                          | LETMD1                                        |                                               | KBTBD4                                 |
|                 | HMBOX1          |                |                                          | LRP1                                          |                                               | LIPO1                                  |
|                 | HNF1A           |                |                                          | LRP1B                                         |                                               | LPIN1                                  |
|                 | HNRNPD          |                |                                          | MCCC1                                         |                                               | LTF                                    |
|                 | HYAL1           |                |                                          | MCCC2                                         |                                               | MANBA                                  |
|                 | IGHA            |                |                                          | MICU1                                         |                                               | MCU                                    |
|                 | IGHV1-9         |                |                                          | MOCS1                                         |                                               | MIER1                                  |
|                 | IGHV7-2         |                |                                          | MRRF                                          |                                               | MMGT1                                  |

| <b>INH only</b> | <b>RIF only</b> | <b>RIF/INH</b> | <b>INH and RIF only, but not RIF/INH</b> | <b>RIF only and RIF/INH, but not INH only</b> | <b>INH only and RIF/INH, but not RIF only</b> | <b>INH only, RIF only, and RIF/INH</b> |
|-----------------|-----------------|----------------|------------------------------------------|-----------------------------------------------|-----------------------------------------------|----------------------------------------|
|                 | IGLC2           |                |                                          | MT-ATP6                                       |                                               | MMP9                                   |
|                 | IIGP1           |                |                                          | MT-CO1                                        |                                               | MOXD1                                  |
|                 | INPP4A          |                |                                          | MTFR1L                                        |                                               | MTHFD2L                                |
|                 | IPO9            |                |                                          | MYO1B                                         |                                               | NAAA                                   |
|                 | ITPR2           |                |                                          | NAGLT1A                                       |                                               | NAGA                                   |
|                 | KCNN2           |                |                                          | NASP                                          |                                               | NAGLU                                  |
|                 | KHNYN           |                |                                          | NDST1                                         |                                               | NAPSA                                  |
|                 | L3MBTL3         |                |                                          | NFIX                                          |                                               | NAT8                                   |
|                 | LNPEP           |                |                                          | NME3                                          |                                               | NGP                                    |
|                 | LSR             |                |                                          | NMNAT3                                        |                                               | NINJ1                                  |
|                 | LYRM4           |                |                                          | NPC1                                          |                                               | NNMT                                   |
|                 | MACROD1         |                |                                          | NR5A2                                         |                                               | PAH                                    |
|                 | MAP2K6          |                |                                          | OTC                                           |                                               | PCBP4                                  |
|                 | MAP3K15         |                |                                          | PACSIN3                                       |                                               | PCK2                                   |
|                 | MARK4           |                |                                          | PAK7                                          |                                               | PGLYRP1                                |
|                 | MBNL1           |                |                                          | PALD1                                         |                                               | PGPEP1                                 |
|                 | MCC             |                |                                          | PCBD2                                         |                                               | PLA2G12B                               |
|                 | MED6            |                |                                          | PCDH1                                         |                                               | PLBD1                                  |
|                 | MOGS            |                |                                          | PGAP1                                         |                                               | PLBD2                                  |
|                 | MTFP1           |                |                                          | PHLDA1                                        |                                               | PLXNB1                                 |
|                 | MTIF2           |                |                                          | POLG2                                         |                                               | PPT1                                   |
|                 | MX1             |                |                                          | PRODH                                         |                                               | PTGS2                                  |
|                 | MX2             |                |                                          | PTDSS1                                        |                                               | RER1                                   |
|                 | NAGS            |                |                                          | PTGES2                                        |                                               | RETN                                   |
|                 | NAPRT           |                |                                          | PTMS                                          |                                               | RETNLG                                 |
|                 | NCBP1           |                |                                          | PTPRF                                         |                                               | RNASET2                                |
|                 | NDUFB5          |                |                                          | PTPRS                                         |                                               | S100A9                                 |
|                 | NDUFS8          |                |                                          | RAB24                                         |                                               | SDC4                                   |
|                 | NFS1            |                |                                          | RBM33                                         |                                               | SDSL                                   |
|                 | NOL10           |                |                                          | RING1                                         |                                               | SELENBP1                               |
|                 | NONO            |                |                                          | SARS2                                         |                                               | SELENBP2                               |
|                 | NRF1            |                |                                          | SDHD                                          |                                               | SENP6                                  |
|                 | NSRP1           |                |                                          | SLC12A9                                       |                                               | SIAE                                   |
|                 | OPTN            |                |                                          | SLC1A2                                        |                                               | SLC17A3                                |
|                 | PAPD5           |                |                                          | SLC22A1                                       |                                               | SLC26A1                                |
|                 | PDCD2           |                |                                          | SLC22A7                                       |                                               | SLC39A14                               |
|                 | PDGFRA          |                |                                          | SLC25A12                                      |                                               | SMIM12                                 |
|                 | PDS5B           |                |                                          | SLC25A15                                      |                                               | SMPD1                                  |

| <b>INH only</b> | <b>RIF only</b> | <b>RIF/INH</b> | <b>INH and RIF only, but not RIF/INH</b> | <b>RIF only and RIF/INH, but not INH only</b> | <b>INH only and RIF/INH, but not RIF only</b> | <b>INH only, RIF only, and RIF/INH</b> |
|-----------------|-----------------|----------------|------------------------------------------|-----------------------------------------------|-----------------------------------------------|----------------------------------------|
|                 | PFAS            |                |                                          | SLC25A25                                      |                                               | STARD3                                 |
|                 | PHF6            |                |                                          | SLC25A48                                      |                                               | STEAP3                                 |
|                 | PLCB3           |                |                                          | SLC29A1                                       |                                               | STXBPL5L                               |
|                 | PNKP            |                |                                          | SLC2A4                                        |                                               | TAF12                                  |
|                 | POLR2I          |                |                                          | SLC30A1                                       |                                               | TAT                                    |
|                 | PPIG            |                |                                          | SLC35A3                                       |                                               | TCIRG1                                 |
|                 | PREX2           |                |                                          | SLC8A2                                        |                                               | TGM1                                   |
|                 | PRKRIR          |                |                                          | SLCO1A1                                       |                                               | TMEM14C                                |
|                 | PROX1           |                |                                          | SRRM2                                         |                                               | TMEM167B                               |
|                 | PRRC2C          |                |                                          | ST3GAL4                                       |                                               | TRAM1                                  |
|                 | PSIP1           |                |                                          | STOML2                                        |                                               | TSPAN33                                |
|                 | PSPH            |                |                                          | STX11                                         |                                               | UBL3                                   |
|                 | PTMA            |                |                                          | SUCLA2                                        |                                               | VAMP5                                  |
|                 | RAB11FIP1       |                |                                          | SULT2A4                                       |                                               | WDR20                                  |
|                 | RAB13           |                |                                          | THEM4                                         |                                               | XDH                                    |
|                 | RAB3IP          |                |                                          | TIMM44                                        |                                               |                                        |
|                 | RAD21           |                |                                          | TMEM11                                        |                                               |                                        |
|                 | RBBP4           |                |                                          | TMEM126A                                      |                                               |                                        |
|                 | RBBP7           |                |                                          | TMEM261                                       |                                               |                                        |
|                 | RELN            |                |                                          | TMEM30A                                       |                                               |                                        |
|                 | RFWD2           |                |                                          | TPST1                                         |                                               |                                        |
|                 | RNF20           |                |                                          | TSC22D1                                       |                                               |                                        |
|                 | RNF213          |                |                                          | TSC22D2                                       |                                               |                                        |
|                 | RRBP1           |                |                                          | TSC22D3                                       |                                               |                                        |
|                 | SART1           |                |                                          | TSC22D4                                       |                                               |                                        |
|                 | SART3           |                |                                          | TSPAN31                                       |                                               |                                        |
|                 | SEC16A          |                |                                          | TTC23L                                        |                                               |                                        |
|                 | SEC31A          |                |                                          | UBXN7                                         |                                               |                                        |
|                 | SEPHS1          |                |                                          | UQCC1                                         |                                               |                                        |
|                 | SERPING1        |                |                                          | UQCC2                                         |                                               |                                        |
|                 | SF1             |                |                                          | UQCRQ                                         |                                               |                                        |
|                 | SF3B5           |                |                                          | URAD                                          |                                               |                                        |
|                 | SFPQ            |                |                                          | USP46                                         |                                               |                                        |
|                 | SH3GLB1         |                |                                          | VDAC3                                         |                                               |                                        |
|                 | SIAH1A          |                |                                          | XPNPEP3                                       |                                               |                                        |
|                 | SIN3A           |                |                                          | ZBTB7B                                        |                                               |                                        |
|                 | SLC25A35        |                |                                          | ZDHHC20                                       |                                               |                                        |
|                 | SLC35A1         |                |                                          | ZNF830                                        |                                               |                                        |



| <b>INH only</b> | <b>RIF only</b> | <b>RIF/INH</b> | <b>INH and RIF only, but not RIF/INH</b> | <b>RIF only and RIF/INH, but not INH only</b> | <b>INH only and RIF/INH, but not RIF only</b> | <b>INH only, RIF only, and RIF/INH</b> |
|-----------------|-----------------|----------------|------------------------------------------|-----------------------------------------------|-----------------------------------------------|----------------------------------------|
|                 |                 |                |                                          |                                               |                                               | SLC9A3R2                               |
|                 |                 |                |                                          |                                               |                                               | SMARCA2                                |
|                 |                 |                |                                          |                                               |                                               | SMC1A                                  |
|                 |                 |                |                                          |                                               |                                               | SMC6                                   |
|                 |                 |                |                                          |                                               |                                               | SMEK2                                  |
|                 |                 |                |                                          |                                               |                                               | SNRPA1                                 |
|                 |                 |                |                                          |                                               |                                               | SNRPB2                                 |
|                 |                 |                |                                          |                                               |                                               | SNW1                                   |
|                 |                 |                |                                          |                                               |                                               | SNX29                                  |
|                 |                 |                |                                          |                                               |                                               | SOAT2                                  |
|                 |                 |                |                                          |                                               |                                               | SPTBN2                                 |
|                 |                 |                |                                          |                                               |                                               | SRA1                                   |
|                 |                 |                |                                          |                                               |                                               | SRCIN1                                 |
|                 |                 |                |                                          |                                               |                                               | SRRM1                                  |
|                 |                 |                |                                          |                                               |                                               | SSR3                                   |
|                 |                 |                |                                          |                                               |                                               | SSRP1                                  |
|                 |                 |                |                                          |                                               |                                               | ST3GAL3                                |
|                 |                 |                |                                          |                                               |                                               | STAM                                   |
|                 |                 |                |                                          |                                               |                                               | STAT6                                  |
|                 |                 |                |                                          |                                               |                                               | SUB1                                   |
|                 |                 |                |                                          |                                               |                                               | SUDS3                                  |
|                 |                 |                |                                          |                                               |                                               | SUPT16                                 |
|                 |                 |                |                                          |                                               |                                               | TARSL2                                 |
|                 |                 |                |                                          |                                               |                                               | TBK1                                   |
|                 |                 |                |                                          |                                               |                                               | TLE1                                   |
|                 |                 |                |                                          |                                               |                                               | TOMIL2                                 |
|                 |                 |                |                                          |                                               |                                               | TRIP4                                  |
|                 |                 |                |                                          |                                               |                                               | TRY10                                  |
|                 |                 |                |                                          |                                               |                                               | TTC39B                                 |
|                 |                 |                |                                          |                                               |                                               | TTC39C                                 |
|                 |                 |                |                                          |                                               |                                               | U2AF2                                  |
|                 |                 |                |                                          |                                               |                                               | UBE2M                                  |
|                 |                 |                |                                          |                                               |                                               | VAMP8                                  |
|                 |                 |                |                                          |                                               |                                               | WDR33                                  |
|                 |                 |                |                                          |                                               |                                               | WDR55                                  |
|                 |                 |                |                                          |                                               |                                               | XPO5                                   |
|                 |                 |                |                                          |                                               |                                               | YARS2                                  |
|                 |                 |                |                                          |                                               |                                               | ZNF592                                 |

| <b>INH only</b> | <b>RIF only</b> | <b>RIF/INH</b> | <b>INH and RIF<br/>only, but not<br/>RIF/INH</b> | <b>RIF only and<br/>RIF/INH, but not<br/>INH only</b> | <b>INH only and<br/>RIF/INH, but<br/>not RIF only</b> | <b>INH only, RIF<br/>only, and<br/>RIF/INH</b> |
|-----------------|-----------------|----------------|--------------------------------------------------|-------------------------------------------------------|-------------------------------------------------------|------------------------------------------------|
| ZNF687          |                 |                |                                                  |                                                       |                                                       |                                                |

INH, isoniazid; RIF, rifampicin; RIF/INH, rifampicin and isoniazid combination treatment.

**Supplementary Table S14.** Proteins increased by treatment in *hPXR* mice.

| <b>INH only</b> | <b>RIF only</b> | <b>RIF/INH</b> | <b>INH and RIF only, but not RIF/INH</b> | <b>RIF only and RIF/INH, but not INH only</b> | <b>INH only and RIF/INH, but not RIF only</b> | <b>INH only, RIF only, and RIF/INH</b> |
|-----------------|-----------------|----------------|------------------------------------------|-----------------------------------------------|-----------------------------------------------|----------------------------------------|
| ACAT1           | ABHD3           | ABHD1          | BCKDK                                    | ABCB1A                                        | APOA1                                         | AAMDC                                  |
| ALAS2           | ACAD12          | ALOX12         | CD81                                     | ABCC3                                         | APOA4                                         | ABCD3                                  |
| BCL9L           | ACTR10          | AMY2           | CHCHD2                                   | ABCC4                                         | AURKAIP1                                      | ABHD5                                  |
| CBX8            | AGPAT6          | ANAPC4         | COX16                                    | ABCD1                                         | CYP2E1                                        | ABL1                                   |
| CCDC174         | AKR1A1          | APOM           | CRBN                                     | ABCD2                                         | EIF4ENIF1                                     | ACAA1A                                 |
| CHCHD7          | AKR1C19         | ARL6IP6        | DEF8                                     | ABHD4                                         | HNRNPM                                        | ACAA1B                                 |
| CLOCK           | ANPEP           | BCAP31         | EIF4H                                    | ACAD11                                        | IGHV5-12                                      | ACACA                                  |
| DNPH1           | APIP            | C4BPA          | G6PDX                                    | ACOT8                                         | MMP14                                         | ACOT1                                  |
| DOLPP1          | APPBP2          | CCDC124        | GIMD1                                    | ACOX2                                         | MRPL11                                        | ACOT2                                  |
| EIF1AD          | ASPA            | CCDC137        | GM1840                                   | ACTR1B                                        | MRPL30                                        | ACOT3                                  |
| ESF1            | ATG7            | CD74           | GPI                                      | ACYP2                                         | MRPL35                                        | ACOT4                                  |
| FABP5           | ATP7B           | CEL            | HNMT                                     | AFM                                           | MRPL47                                        | ACOT6                                  |
| FBXL17          | ATXN10          | CELA2A         | HUS1                                     | AKR1B10                                       | MRPL57                                        | ACSS3                                  |
| FLT1            | BABAM1          | CNIH4          | IQCB1                                    | AKR1B7                                        | MRPS15                                        | ADIPOR2                                |
| G6PC            | BAG6            | COL1A1         | KCNH8                                    | AKR1B8                                        | MRPS18B                                       | AGPAT9                                 |
| GLDC            | BLOC1S5         | COL1A2         | KHK                                      | AKR1D1                                        | MRPS25                                        | AIFM2                                  |
| GLRX2           | BOLA1           | COL4A1         | LRRC28                                   | ALDH1A1                                       | MRPS35                                        | ALB                                    |
| HAO1            | C2CD2           | COL4A2         | MAT2A                                    | ALDH1A2                                       | PKHD1                                         | ALDH3A2                                |
| IGF2BP2         | CBLB            | COL5A2         | MTMR9                                    | ALDH1A3                                       | RBFA                                          | APOA2                                  |
| MAK16           | CCND3           | COL6A5         | NDUFAF7                                  | ALDH1A7                                       | RFX5                                          | APOB                                   |
| MARC1           | CCT6B           | CPA1           | OMA1                                     | ALPL                                          | SERF2                                         | APOC1                                  |
| MRPL1           | CCT8            | CPN2           | PANK1                                    | AMN1                                          | SPAST                                         | APOE                                   |
| MRPL21          | CDC42           | CTRB1          | PKLR                                     | ANGPTL3                                       | TMEM147                                       | APOF                                   |
| MRPL40          | CES2C           | DENND1B        | PSPC1                                    | ANO10                                         |                                               | APOH                                   |
| MRPS11          | CES2G           | EGLN1          | RAB11FIP2                                | ANXA5                                         |                                               | ARPP19                                 |
| MRPS17          | CHDH            | F13B           | RBM17                                    | ANXA7                                         |                                               | ATP2C1                                 |
| MRPS24          | CHID1           | FGB            | RCBTB1                                   | AOX1                                          |                                               | ATP9A                                  |
| MRPS30          | CLPTMIL         | FMNL2          | RGS16                                    | APOC4                                         |                                               | BC027231                               |
| MRPS7           | COG8            | FMO5           | SGPP1                                    | APP                                           |                                               | BHMT                                   |
| MRPS9           | CYB5B           | FN1            | SUGCT                                    | APRT                                          |                                               | BPIFA2                                 |
| MSH3            | CYHR1           | GDE1           | TDP2                                     | ARL2                                          |                                               | CCDC86                                 |
| MT-CO3          | CYP1A1          | GSN            | ZBED5                                    | ASRGL1                                        |                                               | CIAPIN1                                |
| MTND3           | CYP1A2          | H2-AB1         | ZFP219                                   | ATG16L2                                       |                                               | CIDEB                                  |
| MTND5           | CYP2A12         | H2-DMB1        |                                          | ATOX1                                         |                                               | COA3                                   |
| MTX1            | CYP2A22         | H2-EB1         |                                          | BET1                                          |                                               | CPPED1                                 |
| MYEF2           | DCTN3           | IGHV1-9        |                                          | BLOC1S4                                       |                                               | CRAT                                   |
| NANP            | DCTN4           | IGHV7-2        |                                          | BLVRB                                         |                                               | CYP3A11                                |

| <b>INH only</b> | <b>RIF only</b> | <b>RIF/INH</b> | <b>INH and RIF only, but not RIF/INH</b> | <b>RIF only and RIF/INH, but not INH only</b> | <b>INH only and RIF/INH, but not RIF only</b> | <b>INH only, RIF only, and RIF/INH</b> |
|-----------------|-----------------|----------------|------------------------------------------|-----------------------------------------------|-----------------------------------------------|----------------------------------------|
| NDUFB11         | DFFB            | IGLC2          |                                          | BNIP1                                         |                                               | CYP3A16                                |
| OPTN            | DOPEY2          | IMMT           |                                          | BSDC1                                         |                                               | CYP4A10                                |
| PDE4C           | DTNBP1          | ITIH1          |                                          | CACYBP                                        |                                               | CYP4A14                                |
| RDH10           | DUS2            | KLKB1          |                                          | CAPG                                          |                                               | CYP4A31                                |
| RMDN2           | DVL3            | KNG2           |                                          | CAT                                           |                                               | CYP4A32                                |
| RPL7L1          | EEF1E1          | LGALS3         |                                          | CBR1                                          |                                               | CYP8B1                                 |
| RPP25L          | EIF2AK4         | LRRC32         |                                          | CBR3                                          |                                               | D17WSU92E                              |
| S100A1          | ERLEC1          | LTBP1          |                                          | CCDC91                                        |                                               | D2HGDH                                 |
| SAP30L          | ESRP1           | MAPKAPK5       |                                          | CD36                                          |                                               | D8ERTD738E                             |
| SARNP           | FAM126A         | MRPS21         |                                          | CD5L                                          |                                               | DAPK2                                  |
| SCARB2          | FAM169B         | MST1           |                                          | CDA                                           |                                               | DDAH1                                  |
| SLC10A1         | FAM63B          | MTERF1A        |                                          | CDC34                                         |                                               | DDX52                                  |
| SLC29A1         | FBXO4           | MYO1A          |                                          | CDK5RAP1                                      |                                               | DHDDS                                  |
| SLC2A4          | FBXW5           | NCLN           |                                          | CDK6                                          |                                               | DHRS7B                                 |
| SLC35A3         | FHIT            | NEU1           |                                          | CDKN2C                                        |                                               | DLAT                                   |
| SLC44A1         | FOCAD           | NOMO1          |                                          | CENPV                                         |                                               | DLG5                                   |
| TACO1           | GANC            | NOS2           |                                          | CES1                                          |                                               | EHHADH                                 |
| TJP3            | GET4            | PLA2G7         |                                          | CES1B                                         |                                               | ELOVL6                                 |
| TNKS1BP1        | GFPT1           | PNLIP          |                                          | CES1C                                         |                                               | EMG1                                   |
| ZBTB45          | GIN54           | PNLIPRP1       |                                          | CES1D                                         |                                               | ENSA                                   |
|                 | GLYCTK          | PPFIBP1        |                                          | CES2A                                         |                                               | FAAP100                                |
|                 | GM20441         | RAD1           |                                          | CES2B                                         |                                               | FAM185A                                |
|                 | GMFB            | RGL2           |                                          | CES5A                                         |                                               | FAM192A                                |
|                 | GSR             | RNF185         |                                          | CGRRF1                                        |                                               | FAM195A                                |
|                 | HINT3           | RPL18          |                                          | CHCHD6                                        |                                               | FAM32A                                 |
|                 | IBA57           | RPS25          |                                          | CHMP5                                         |                                               | FAM73B                                 |
|                 | IMPACT          | SERPINA1B      |                                          | CHP1                                          |                                               | FER1L6                                 |
|                 | INMT            | SERPINA1D      |                                          | CMAS                                          |                                               | FITM2                                  |
|                 | ISOC2B          | SLC23A2        |                                          | CMBL                                          |                                               | FKBP8                                  |
|                 | KIF16B          | SRCIN1         |                                          | CP                                            |                                               | FKBPL                                  |
|                 | LNP             | SYNE3          |                                          | CRCP                                          |                                               | FMO1                                   |
|                 | LRRC20          | TECR           |                                          | CREB3L3                                       |                                               | FOXP1                                  |
|                 | MAST2           | TIMM8B         |                                          | CREG1                                         |                                               | GM4952                                 |
|                 | MBLAC2          | TPM4           |                                          | CRP                                           |                                               | GM4978                                 |
|                 | MCEE            | UBE2L6         |                                          | CUEDC2                                        |                                               | GP1BA                                  |
|                 | MIEN1           | UGGT2          |                                          | CYB5A                                         |                                               | GP9                                    |
|                 | MLKL            | UGT2B36        |                                          | CYB5R3                                        |                                               | GPAM                                   |
|                 | MME             | ZGPAT          |                                          | CYP2A4                                        |                                               | GPT2                                   |

| <b>INH only</b> | <b>RIF only</b> | <b>RIF/INH</b> | <b>INH and RIF only, but not RIF/INH</b> | <b>RIF only and RIF/INH, but not INH only</b> | <b>INH only and RIF/INH, but not RIF only</b> | <b>INH only, RIF only, and RIF/INH</b> |
|-----------------|-----------------|----------------|------------------------------------------|-----------------------------------------------|-----------------------------------------------|----------------------------------------|
|                 | MOCOS           |                |                                          | CYP2A5                                        |                                               | GRIN3B                                 |
|                 | MROH1           |                |                                          | CYP2B10                                       |                                               | GZF1                                   |
|                 | MSRA            |                |                                          | CYP2C29                                       |                                               | H1F0                                   |
|                 | MTR             |                |                                          | CYP2C38                                       |                                               | H3F3A                                  |
|                 | MYO5A           |                |                                          | CYP2C39                                       |                                               | HIST1H1A                               |
|                 | MYO5C           |                |                                          | CYP2C55                                       |                                               | HIST1H1B                               |
|                 | MYT1L           |                |                                          | CYP3A25                                       |                                               | HIST1H1C                               |
|                 | NAA25           |                |                                          | CYP3A41A                                      |                                               | HIST1H1E                               |
|                 | NAPA            |                |                                          | CYP3A44                                       |                                               | HIST1H3A                               |
|                 | NAV2            |                |                                          | CYP3A57                                       |                                               | HIST1H3B                               |
|                 | NBAS            |                |                                          | CYP3A59                                       |                                               | HMGCS1                                 |
|                 | NDRG1           |                |                                          | DCTN1                                         |                                               | HMGCS2                                 |
|                 | NOS3            |                |                                          | DECR2                                         |                                               | HOPX                                   |
|                 | NT5DC1          |                |                                          | DERL1                                         |                                               | HPGD                                   |
|                 | NUDT2           |                |                                          | DGKE                                          |                                               | HSCB                                   |
|                 | NUTF2           |                |                                          | DHCR24                                        |                                               | IGSF5                                  |
|                 | PACS2           |                |                                          | DHX37                                         |                                               | IL1RAP                                 |
|                 | PAPSS2          |                |                                          | DMPK                                          |                                               | IREB2                                  |
|                 | PARP4           |                |                                          | DNAH7B                                        |                                               | ITGA2B                                 |
|                 | PBDC1           |                |                                          | DNAJA2                                        |                                               | KANSL3                                 |
|                 | PEBP1           |                |                                          | DNAJB2                                        |                                               | KDSR                                   |
|                 | PEX1            |                |                                          | DUSP3                                         |                                               | MAN2C1                                 |
|                 | PEX12           |                |                                          | DYNC1LI2                                      |                                               | MAT1A                                  |
|                 | PEX5            |                |                                          | ECHDC1                                        |                                               | ME1                                    |
|                 | PHYKPL          |                |                                          | EEPD1                                         |                                               | MGLL                                   |
|                 | PI4KA           |                |                                          | ENTPD5                                        |                                               | MGME1                                  |
|                 | PIR             |                |                                          | EPHX1                                         |                                               | MGMT                                   |
|                 | PLIN3           |                |                                          | ERMP1                                         |                                               | MMRN1                                  |
|                 | PON1            |                |                                          | F10                                           |                                               | MRPS12                                 |
|                 | PPCDC           |                |                                          | F12                                           |                                               | MTERF2                                 |
|                 | PPP2R1A         |                |                                          | F2                                            |                                               | MTG1                                   |
|                 | PRDX3           |                |                                          | FAM175B                                       |                                               | NCEH1                                  |
|                 | PRKACA          |                |                                          | FBXW9                                         |                                               | NEBL                                   |
|                 | PRKRA           |                |                                          | FDFT1                                         |                                               | NKTR                                   |
|                 | PRMT9           |                |                                          | FHAD1                                         |                                               | NPRL3                                  |
|                 | PSMA7           |                |                                          | FKBP1A                                        |                                               | OSBPL3                                 |
|                 | PSMB2           |                |                                          | FMO9                                          |                                               | PANK2                                  |
|                 | PSMD12          |                |                                          | FUT8                                          |                                               | PCTP                                   |

| <b>INH only</b> | <b>RIF only</b> | <b>RIF/INH</b> | <b>INH and RIF only, but not RIF/INH</b> | <b>RIF only and RIF/INH, but not INH only</b> | <b>INH only and RIF/INH, but not RIF only</b> | <b>INH only, RIF only, and RIF/INH</b> |
|-----------------|-----------------|----------------|------------------------------------------|-----------------------------------------------|-----------------------------------------------|----------------------------------------|
|                 | PSMG1           |                |                                          | GALE                                          |                                               | PDK1                                   |
|                 | PSMG2           |                |                                          | GALK1                                         |                                               | PDK2                                   |
|                 | PXMP2           |                |                                          | GGCT                                          |                                               | PEX11A                                 |
|                 | PYROXD2         |                |                                          | GM10639                                       |                                               | PEX16                                  |
|                 | R3HCC1          |                |                                          | GNPAT                                         |                                               | PEX2                                   |
|                 | RAB18           |                |                                          | GP5                                           |                                               | PF4                                    |
|                 | RAB3GAP2        |                |                                          | GPX4                                          |                                               | PGD                                    |
|                 | REEP3           |                |                                          | GPX7                                          |                                               | PGS1                                   |
|                 | RNF14           |                |                                          | GSTA1                                         |                                               | PIGX                                   |
|                 | RRP1B           |                |                                          | GSTA4                                         |                                               | PLEK                                   |
|                 | SDR39U1         |                |                                          | GSTM1                                         |                                               | PLEKHA1                                |
|                 | SERHL           |                |                                          | GSTM2                                         |                                               | PLIN2                                  |
|                 | SHPK            |                |                                          | GSTM3                                         |                                               | PNPLA2                                 |
|                 | SIRT2           |                |                                          | GSTM4                                         |                                               | PNPLA3                                 |
|                 | SLC25A10        |                |                                          | GSTM5                                         |                                               | POMP                                   |
|                 | SNAP25          |                |                                          | GSTM6                                         |                                               | PRKCA                                  |
|                 | STARD10         |                |                                          | GSTM7                                         |                                               | PSMG3                                  |
|                 | TBC1D24         |                |                                          | GSTT2                                         |                                               | PTK2B                                  |
|                 | TBCD            |                |                                          | GSTT3                                         |                                               | PTS                                    |
|                 | TGM2            |                |                                          | H2-Q10                                        |                                               | RAB30                                  |
|                 | TM7SF2          |                |                                          | HAUS3                                         |                                               | RARRES1                                |
|                 | TMED3           |                |                                          | HGFAC                                         |                                               | RBM8                                   |
|                 | TMEM135         |                |                                          | HSD17B12                                      |                                               | RBM8A                                  |
|                 | TMEM223         |                |                                          | HSD17B4                                       |                                               | REEP6                                  |
|                 | TMUB2           |                |                                          | HSD17B7                                       |                                               | RPIA                                   |
|                 | TMX2            |                |                                          | HSPB1                                         |                                               | RPL14                                  |
|                 | TPRG1L          |                |                                          | HTATIP2                                       |                                               | RPL22L1                                |
|                 | TSR2            |                |                                          | ICA                                           |                                               | RPL24                                  |
|                 | TXN             |                |                                          | IFI27L2B                                      |                                               | RPL28                                  |
|                 | UBA5            |                |                                          | IFIT1                                         |                                               | RPL35                                  |
|                 | UBFD1           |                |                                          | ITPKB                                         |                                               | RPL4                                   |
|                 | UBL4A           |                |                                          | KIAA0100                                      |                                               | RPL6                                   |
|                 | VPS13D          |                |                                          | KIF21A                                        |                                               | RPL7                                   |
|                 | VTA1            |                |                                          | KLHDC10                                       |                                               | RPL7A                                  |
|                 | WBSCR27         |                |                                          | KNG1                                          |                                               | RPL8                                   |
|                 | WWC1            |                |                                          | LAMA1                                         |                                               | RPS6KA1                                |
|                 | ZW10            |                |                                          | LGALS1                                        |                                               | RRP36                                  |
|                 |                 |                |                                          | LHPP                                          |                                               | RSL1D1                                 |

| <b>INH only</b> | <b>RIF only</b> | <b>RIF/INH</b> | <b>INH and RIF only, but not RIF/INH</b> | <b>RIF only and RIF/INH, but not INH only</b> | <b>INH only and RIF/INH, but not RIF only</b> | <b>INH only, RIF only, and RIF/INH</b> |
|-----------------|-----------------|----------------|------------------------------------------|-----------------------------------------------|-----------------------------------------------|----------------------------------------|
|                 |                 |                |                                          | LPIN3                                         |                                               | RTFDC1                                 |
|                 |                 |                |                                          | MAPRE3                                        |                                               | SDC1                                   |
|                 |                 |                |                                          | MARCH6                                        |                                               | SECISBP2L                              |
|                 |                 |                |                                          | MASP2                                         |                                               | SERPINB1A                              |
|                 |                 |                |                                          | METTL7B                                       |                                               | SERPINB1C                              |
|                 |                 |                |                                          | METTL9                                        |                                               | SERPINB6B                              |
|                 |                 |                |                                          | MGST1                                         |                                               | SLAIN2                                 |
|                 |                 |                |                                          | MICAL2                                        |                                               | SLC47A1                                |
|                 |                 |                |                                          | MSTO1                                         |                                               | SLCO1A4                                |
|                 |                 |                |                                          | MVP                                           |                                               | SMTN                                   |
|                 |                 |                |                                          | MYO19                                         |                                               | SNAP29                                 |
|                 |                 |                |                                          | MYO5B                                         |                                               | SPP2                                   |
|                 |                 |                |                                          | N6AMT2                                        |                                               | ST3GAL5                                |
|                 |                 |                |                                          | NAA20                                         |                                               | STS                                    |
|                 |                 |                |                                          | NADK                                          |                                               | SVIP                                   |
|                 |                 |                |                                          | NAGK                                          |                                               | SYNJ2                                  |
|                 |                 |                |                                          | NBEAL1                                        |                                               | TDRKH                                  |
|                 |                 |                |                                          | NCF1                                          |                                               | THBS1                                  |
|                 |                 |                |                                          | NEB                                           |                                               | THRSP                                  |
|                 |                 |                |                                          | NMT2                                          |                                               | TIMP3                                  |
|                 |                 |                |                                          | NOL3                                          |                                               | TKT                                    |
|                 |                 |                |                                          | NQO1                                          |                                               | TMCC3                                  |
|                 |                 |                |                                          | NRDE2                                         |                                               | TMEM205                                |
|                 |                 |                |                                          | NSDHL                                         |                                               | TMEM263                                |
|                 |                 |                |                                          | NUDT12                                        |                                               | TMLHE                                  |
|                 |                 |                |                                          | OAT                                           |                                               | TMPRSS11B                              |
|                 |                 |                |                                          | OBFC1                                         |                                               | TOP1MT                                 |
|                 |                 |                |                                          | ODR4                                          |                                               | TPD52                                  |
|                 |                 |                |                                          | P4HTM                                         |                                               | TRIAP1                                 |
|                 |                 |                |                                          | PAFAH2                                        |                                               | TRUB2                                  |
|                 |                 |                |                                          | PDXP                                          |                                               | TSSC4                                  |
|                 |                 |                |                                          | PEO1                                          |                                               | TTR                                    |
|                 |                 |                |                                          | PEX10                                         |                                               | UCK1                                   |
|                 |                 |                |                                          | PEX11G                                        |                                               | USP40                                  |
|                 |                 |                |                                          | PEX13                                         |                                               | USP45                                  |
|                 |                 |                |                                          | PEX14                                         |                                               | VNN1                                   |
|                 |                 |                |                                          | PEX19                                         |                                               | VNN3                                   |
|                 |                 |                |                                          | PEX26                                         |                                               | WDR73                                  |

| <b>INH only</b> | <b>RIF only</b> | <b>RIF/INH</b> | <b>INH and RIF only, but not RIF/INH</b> | <b>RIF only and RIF/INH, but not INH only</b> | <b>INH only and RIF/INH, but not RIF only</b> | <b>INH only, RIF only, and RIF/INH</b> |
|-----------------|-----------------|----------------|------------------------------------------|-----------------------------------------------|-----------------------------------------------|----------------------------------------|
|                 |                 |                |                                          | PEX3                                          |                                               | ZNF22                                  |
|                 |                 |                |                                          | PEX6                                          |                                               |                                        |
|                 |                 |                |                                          | PGLYRP2                                       |                                               |                                        |
|                 |                 |                |                                          | PGRMC2                                        |                                               |                                        |
|                 |                 |                |                                          | PITRM1                                        |                                               |                                        |
|                 |                 |                |                                          | PLA2G6                                        |                                               |                                        |
|                 |                 |                |                                          | PLIN4                                         |                                               |                                        |
|                 |                 |                |                                          | PLTP                                          |                                               |                                        |
|                 |                 |                |                                          | PNPLA8                                        |                                               |                                        |
|                 |                 |                |                                          | POLR1E                                        |                                               |                                        |
|                 |                 |                |                                          | POR                                           |                                               |                                        |
|                 |                 |                |                                          | PROZ                                          |                                               |                                        |
|                 |                 |                |                                          | PRUNE                                         |                                               |                                        |
|                 |                 |                |                                          | PSAT1                                         |                                               |                                        |
|                 |                 |                |                                          | PSMD5                                         |                                               |                                        |
|                 |                 |                |                                          | PUSL1                                         |                                               |                                        |
|                 |                 |                |                                          | PXMP4                                         |                                               |                                        |
|                 |                 |                |                                          | PZP                                           |                                               |                                        |
|                 |                 |                |                                          | RBP4                                          |                                               |                                        |
|                 |                 |                |                                          | RDH16                                         |                                               |                                        |
|                 |                 |                |                                          | RDH9                                          |                                               |                                        |
|                 |                 |                |                                          | REEP5                                         |                                               |                                        |
|                 |                 |                |                                          | REXO2                                         |                                               |                                        |
|                 |                 |                |                                          | RIN2                                          |                                               |                                        |
|                 |                 |                |                                          | ROBO1                                         |                                               |                                        |
|                 |                 |                |                                          | RPF2                                          |                                               |                                        |
|                 |                 |                |                                          | RTP4                                          |                                               |                                        |
|                 |                 |                |                                          | SAV1                                          |                                               |                                        |
|                 |                 |                |                                          | SDHAF1                                        |                                               |                                        |
|                 |                 |                |                                          | SERPINA6                                      |                                               |                                        |
|                 |                 |                |                                          | SERPINA7                                      |                                               |                                        |
|                 |                 |                |                                          | SERPINC1                                      |                                               |                                        |
|                 |                 |                |                                          | SERPINF1                                      |                                               |                                        |
|                 |                 |                |                                          | SERPINF2                                      |                                               |                                        |
|                 |                 |                |                                          | SHCBP1L                                       |                                               |                                        |
|                 |                 |                |                                          | SLC22A18                                      |                                               |                                        |
|                 |                 |                |                                          | SLPI                                          |                                               |                                        |
|                 |                 |                |                                          | SMAD2                                         |                                               |                                        |



| <b>INH only</b> | <b>RIF only</b> | <b>RIF/INH</b> | <b>INH and RIF<br/>only, but not<br/>RIF/INH</b> | <b>RIF only and<br/>RIF/INH, but<br/>not INH only</b> | <b>INH only and<br/>RIF/INH, but<br/>not RIF only</b> | <b>INH only, RIF<br/>only, and<br/>RIF/INH</b> |
|-----------------|-----------------|----------------|--------------------------------------------------|-------------------------------------------------------|-------------------------------------------------------|------------------------------------------------|
|                 |                 |                |                                                  | SRXN1                                                 |                                                       |                                                |
|                 |                 |                |                                                  | STAU2                                                 |                                                       |                                                |
|                 |                 |                |                                                  | STRADB                                                |                                                       |                                                |
|                 |                 |                |                                                  | SULT2A1                                               |                                                       |                                                |
|                 |                 |                |                                                  | SYAP1                                                 |                                                       |                                                |
|                 |                 |                |                                                  | SYNPO                                                 |                                                       |                                                |
|                 |                 |                |                                                  | TBCE                                                  |                                                       |                                                |
|                 |                 |                |                                                  | TBCEL                                                 |                                                       |                                                |
|                 |                 |                |                                                  | TCN2                                                  |                                                       |                                                |
|                 |                 |                |                                                  | TDRD7                                                 |                                                       |                                                |
|                 |                 |                |                                                  | TEP1                                                  |                                                       |                                                |
|                 |                 |                |                                                  | TEX2                                                  |                                                       |                                                |
|                 |                 |                |                                                  | TMA7                                                  |                                                       |                                                |
|                 |                 |                |                                                  | TMEM109                                               |                                                       |                                                |
|                 |                 |                |                                                  | TMEM120A                                              |                                                       |                                                |
|                 |                 |                |                                                  | TMEM259                                               |                                                       |                                                |
|                 |                 |                |                                                  | TMEM51                                                |                                                       |                                                |
|                 |                 |                |                                                  | TMX1                                                  |                                                       |                                                |
|                 |                 |                |                                                  | TNFSF10                                               |                                                       |                                                |
|                 |                 |                |                                                  | TRAK2                                                 |                                                       |                                                |
|                 |                 |                |                                                  | TTC7                                                  |                                                       |                                                |
|                 |                 |                |                                                  | TTPA                                                  |                                                       |                                                |
|                 |                 |                |                                                  | TXNDC15                                               |                                                       |                                                |
|                 |                 |                |                                                  | TYW1                                                  |                                                       |                                                |
|                 |                 |                |                                                  | UAP1L1                                                |                                                       |                                                |
|                 |                 |                |                                                  | UBASH3B                                               |                                                       |                                                |
|                 |                 |                |                                                  | UBXN4                                                 |                                                       |                                                |
|                 |                 |                |                                                  | UCKL1                                                 |                                                       |                                                |
|                 |                 |                |                                                  | UGDH                                                  |                                                       |                                                |
|                 |                 |                |                                                  | UGT1A1                                                |                                                       |                                                |
|                 |                 |                |                                                  | UGT1A10                                               |                                                       |                                                |
|                 |                 |                |                                                  | UGT1A5                                                |                                                       |                                                |
|                 |                 |                |                                                  | UGT1A7C                                               |                                                       |                                                |
|                 |                 |                |                                                  | UGT1A9                                                |                                                       |                                                |
|                 |                 |                |                                                  | UGT2B34                                               |                                                       |                                                |
|                 |                 |                |                                                  | UGT2B35                                               |                                                       |                                                |
|                 |                 |                |                                                  | UPP1                                                  |                                                       |                                                |
|                 |                 |                |                                                  | UROS                                                  |                                                       |                                                |

| <b>INH only</b> | <b>RIF only</b> | <b>RIF/INH</b> | <b>INH and RIF<br/>only, but not<br/>RIF/INH</b> | <b>RIF only and<br/>RIF/INH, but<br/>not INH only</b> | <b>INH only and<br/>RIF/INH, but<br/>not RIF only</b> | <b>INH only, RIF<br/>only, and<br/>RIF/INH</b> |
|-----------------|-----------------|----------------|--------------------------------------------------|-------------------------------------------------------|-------------------------------------------------------|------------------------------------------------|
|                 |                 |                |                                                  | USE1                                                  |                                                       |                                                |
|                 |                 |                |                                                  | WDR34                                                 |                                                       |                                                |
|                 |                 |                |                                                  | WDR77                                                 |                                                       |                                                |
|                 |                 |                |                                                  | WVOX                                                  |                                                       |                                                |
|                 |                 |                |                                                  | ZBTB21                                                |                                                       |                                                |
|                 |                 |                |                                                  | ZCCHC11                                               |                                                       |                                                |
|                 |                 |                |                                                  | ZFPL1                                                 |                                                       |                                                |
|                 |                 |                |                                                  | ZNF804A                                               |                                                       |                                                |
|                 |                 |                |                                                  | ZNHIT2                                                |                                                       |                                                |

INH, isoniazid; RIF, rifampicin; RIF/INH, rifampicin and isoniazid combination treatment.

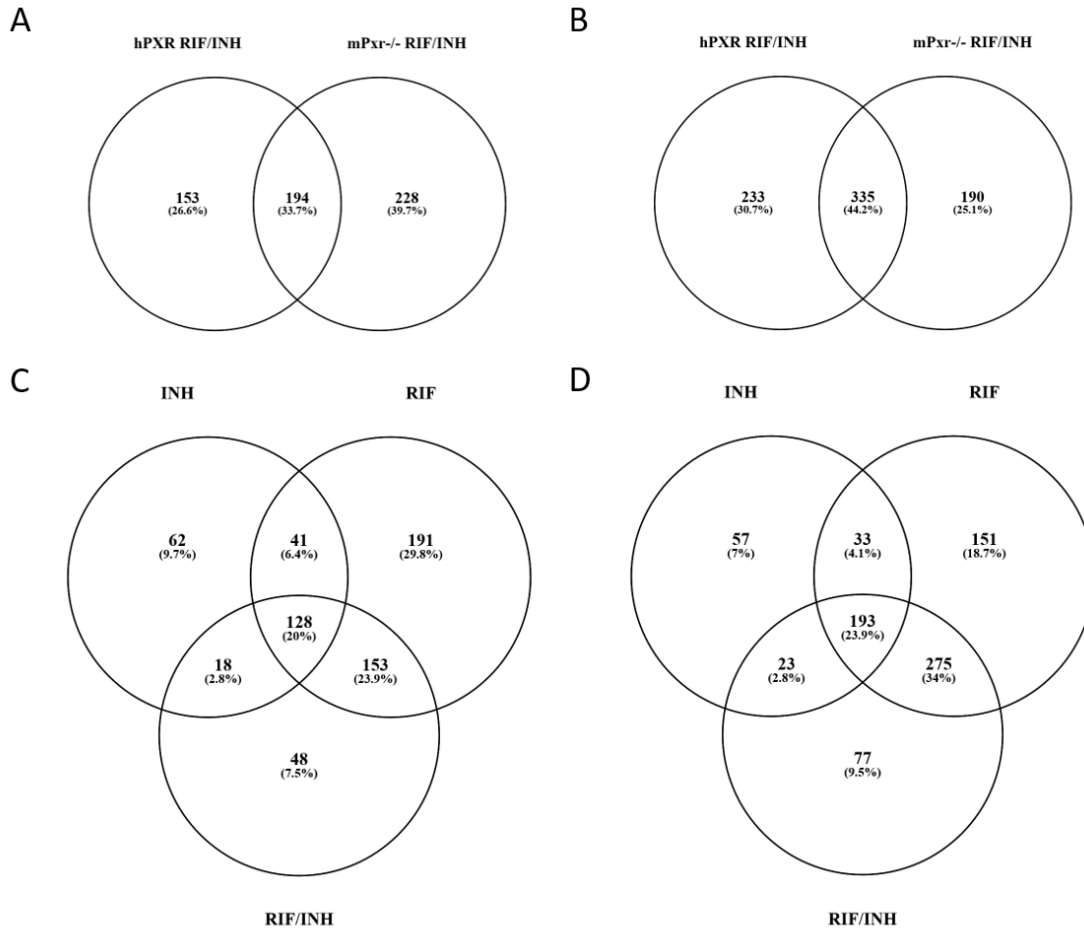

**Supplementary Figure S1.** Venn diagrams of protein expression changes. (**A, B**) Venn diagrams demonstrating the overlap between and specificity of proteins changed in the different mouse strains (*hPXR* or *mPxr<sup>-/-</sup>* mice) and (**C, D**) *hPXR* mice drug treatment groups. Upregulated proteins (**B, D**) and downregulated proteins (**A, C**) are shown. Only changes with a magnitude greater than 1.15-relative or less than 0.85-relative with a significance of  $p < 0.05$  are displayed, as determined by one-way ANOVA with Dunnett post hoc analysis.

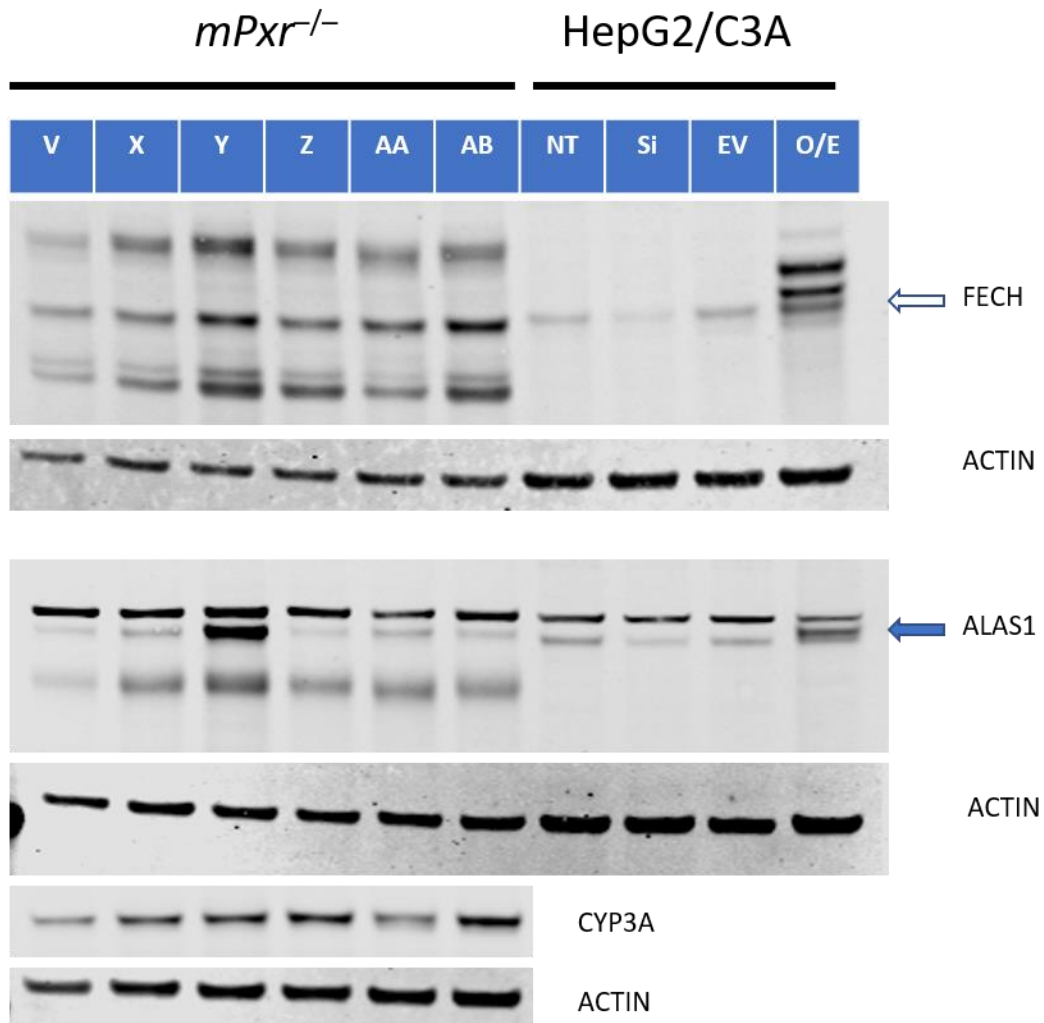

**Supplementary Figure S2.** Protein expression of mouse *mPxr*<sup>-/-</sup> liver samples considered for proteomics analysis. Immunoblotting of FECH, ALAS1, and CYP3A in *mPxr*<sup>-/-</sup> mouse livers for selection in proteomic analysis (lanes 1-6). For HepG2/C3A (lanes 7-10): NT, non-targeting transfected control siRNA3 (Cat # D-001210-03); Si, either HepG2/C3A lysate siFECH (Cat #D-011036-01-0002) (top two panels), or siALAS1 (Cat # M-009276-00) (bottom two panels); EV, empty vector (pcDNA3); O/E, ectopic overexpression of FECH (top two panels) or ALAS1 (bottom two panels) proteins from plasmids. Letters under treatment groups indicate individual mice. Closed arrow indicates mature ALAS1. Open arrow indicates FECH.

*hPXR*

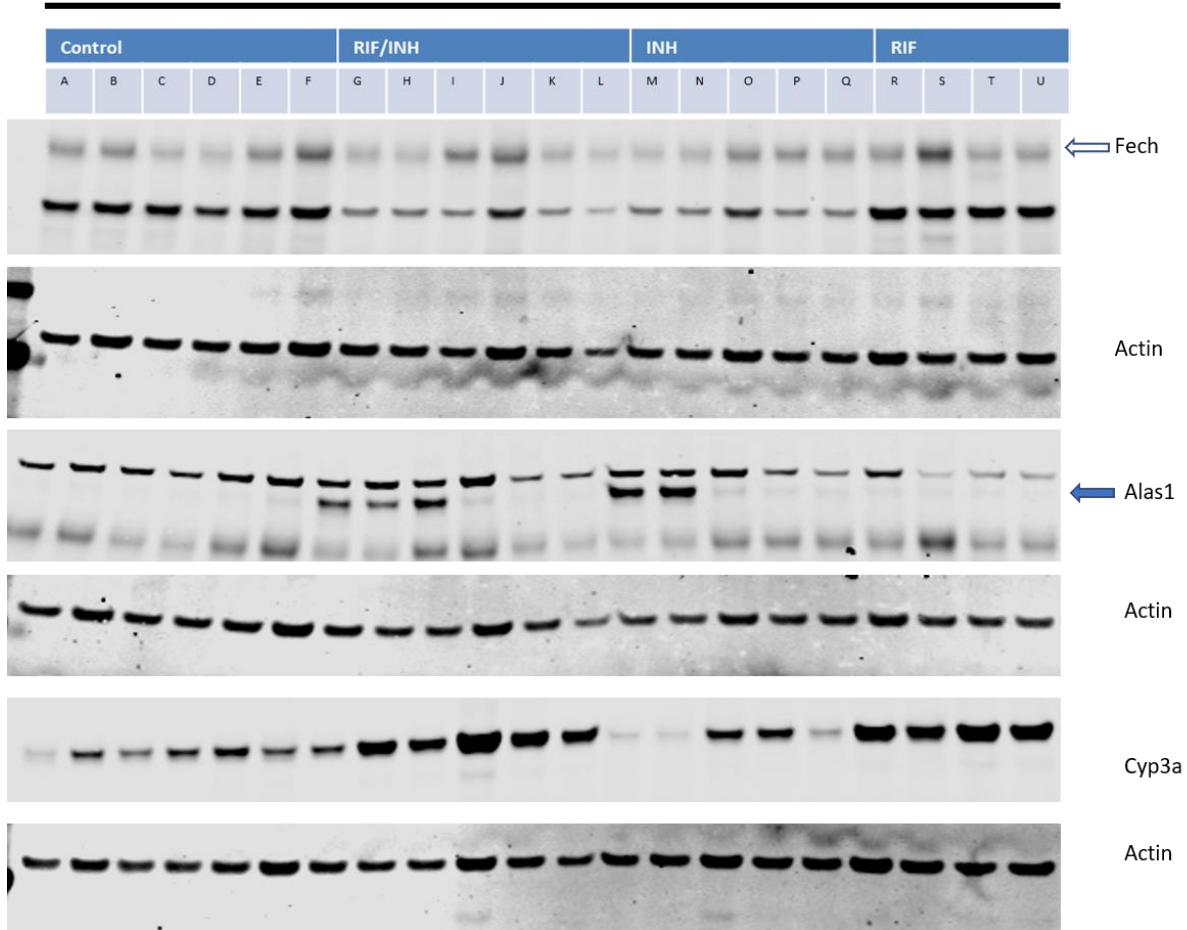

**Supplementary Figure S3.** Protein expression in mouse *hPXR* liver samples considered for proteomics analysis. Immunoblotting of FECH, ALAS1, and CYP3A in *hPXR* mouse livers for selection in proteomic analysis. Letters under treatment groups indicate individual mice. Closed arrow indicates mature ALAS1. Open arrow indicates FECH.

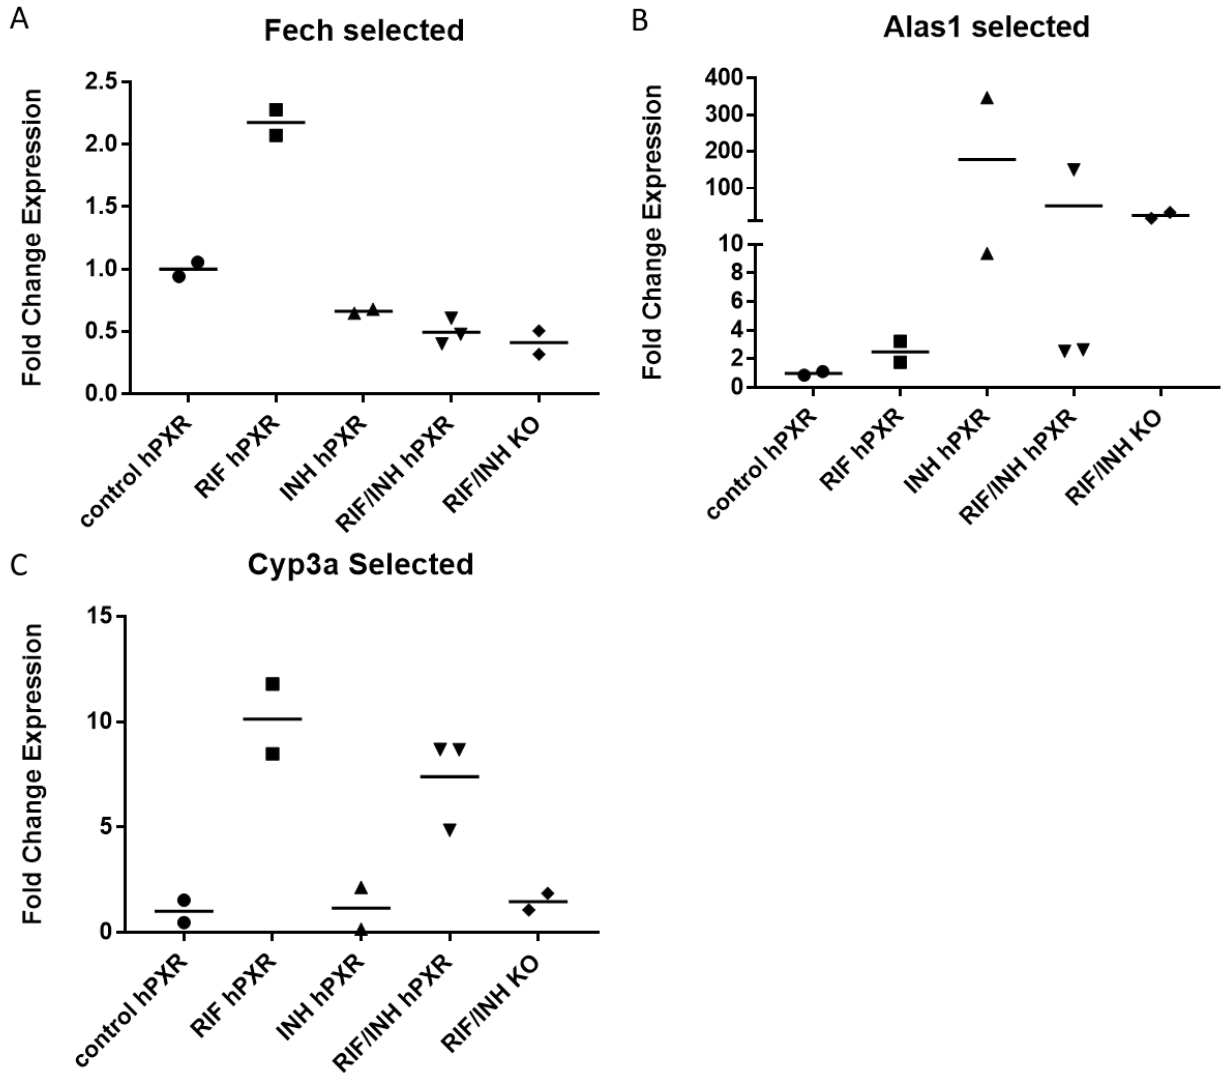

**Supplementary Figure S4.** Quantification of Western blots of mouse livers selected for proteomics analysis. (A) FECH, (B) ALAS1, and (C) CYP3A.

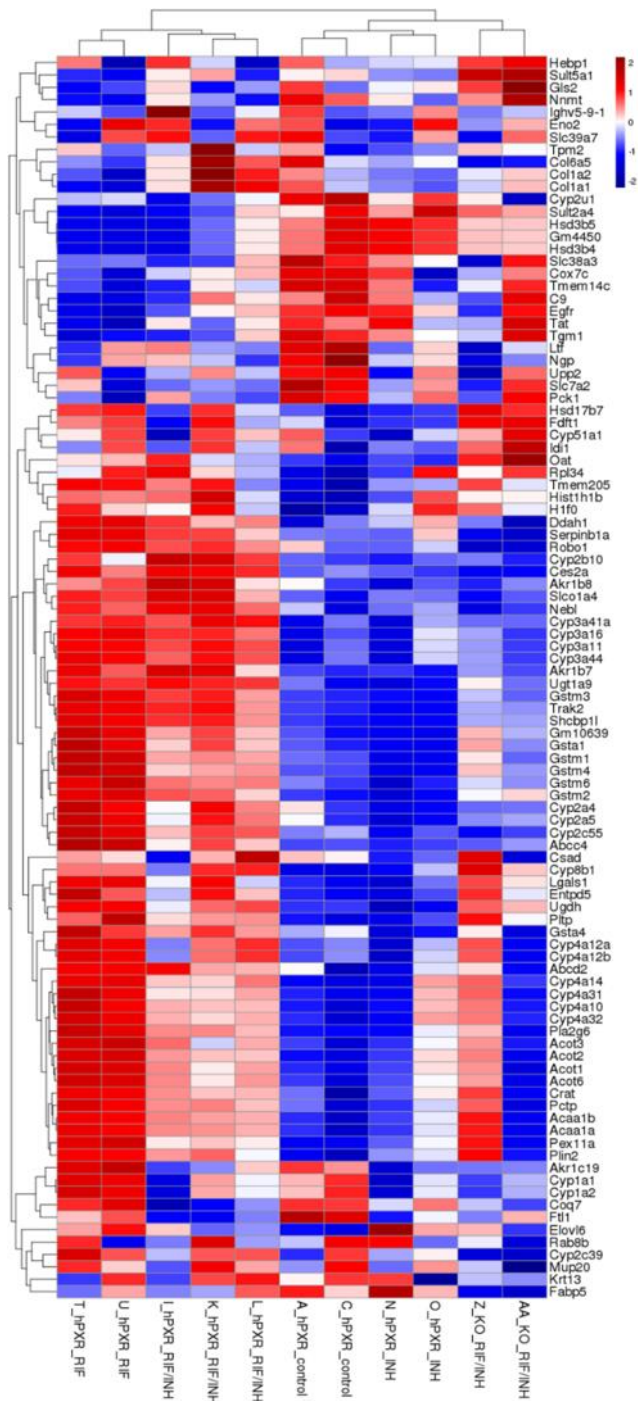

**Supplementary Figure S5.** Hierarchical clustering analysis for mouse liver proteomic profiling. Hierarchical clustering of the top 100 most variable differentially expressed proteins among the treatment groups. Low-expression proteins (peptide sequence matches < 10) were filtered, and the top 100 most variable proteins are displayed. Only changes with  $p < 0.01$  are displayed (one-way ANOVA with Dunnett post-hoc analysis). Z-scores are shown, in which red indicates upregulated and blue indicates downregulated proteins. Letters (T, U, I, K, L, A, C, N, O, Z, AA) indicate individual mice. hPXR\_INH = hPXR mice treated with isoniazid; hPXR\_RIF = hPXR mice treated with rifampicin; KO\_RIF/INH = *mPxr*<sup>-/-</sup> mice treated with rifampicin and

isoniazid; hPXR\_RIF/INH = *hPXR* mice treated with both rifampicin and isoniazid. hPXR\_control = *hPXR* mice treated with vehicle.



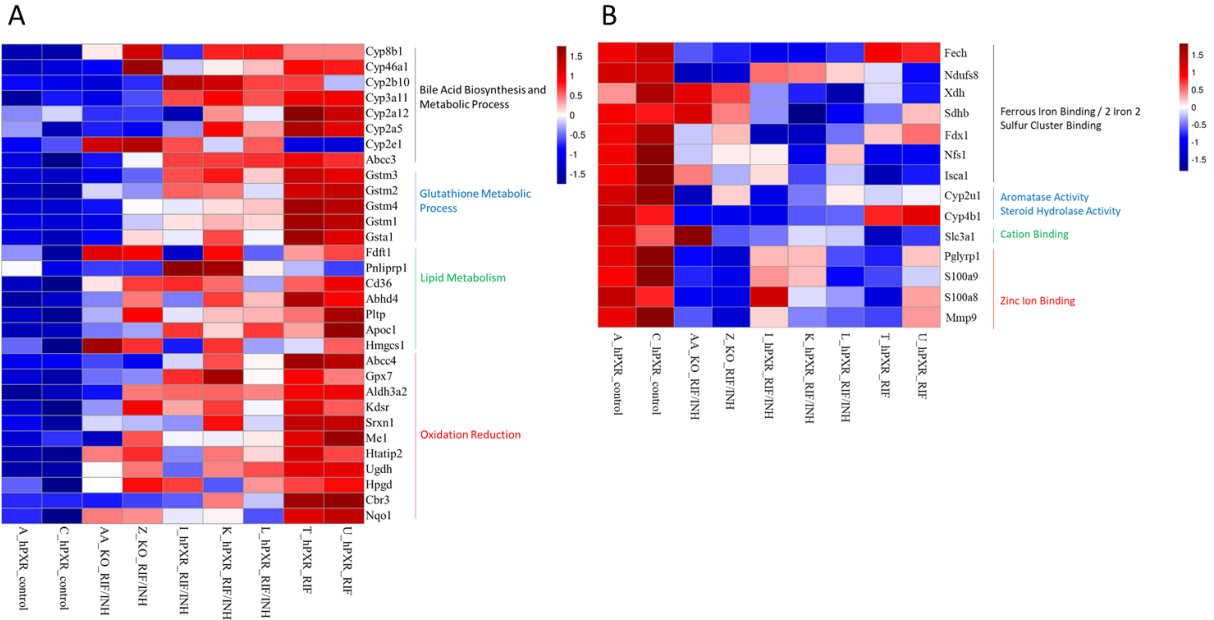

**Supplementary Figure S6.** Heatmap of selected protein changes. Z-scores are shown, in which red indicates upregulated and blue indicates downregulated proteins. Letters (T, U, I, K, L, A, C, Z, AA) indicate individual mice. hPXR\_RIF = *hPXR* mice treated with rifampicin; KO\_RIF/INH = *mPxr*<sup>-/-</sup> mice treated with rifampicin and isoniazid; hPXR\_RIF/INH = *hPXR* mice treated with both rifampicin and isoniazid. hPXR\_control = *hPXR* mice treated with vehicle.
